# Supplementary material
Source: publisher figshare collection journal article supplement (https://acs.figshare.com/ndownloader/files/9305632)
Supplement: Supplementary file 1 [file 9305632]

# Hydrosilylation of Aldehydes and Formates Using a Dimeric Manganese Precatalyst

*Supporting Information*

*Tufan K. Mukhopadhyay, Chandrani Ghosh, Marco Flores, Thomas L. Groy, Ryan J. Trovitch\**

*School of Molecular Sciences, Arizona State University, Tempe, Arizona 85287*

*ryan.trovitch@asu.edu*

## PRECATALYST CHARACTERIZATION

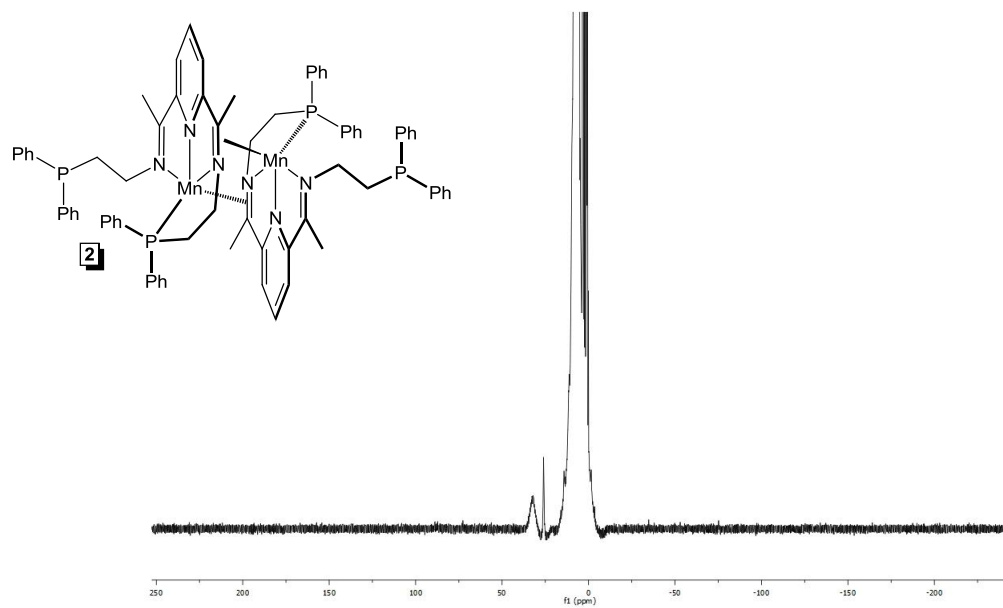

**Figure S1.**  $^1\text{H}$  NMR spectrum of **2** in benzene- $d_6$  at 23 °C.

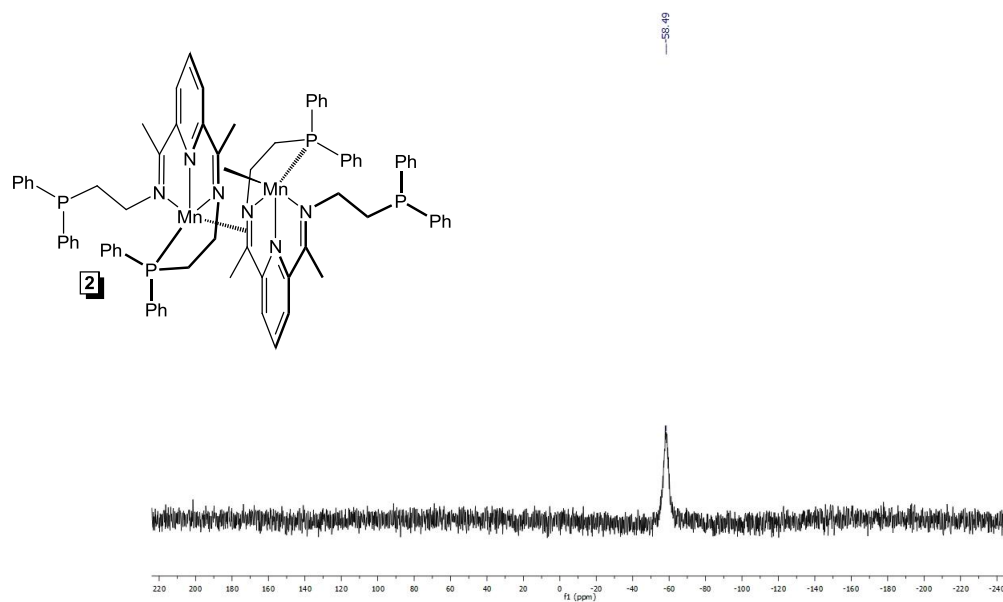

**Figure S2:**  $^{31}\text{P}$  NMR spectrum of **2** in benzene- $d_6$  at 23 °C.

# X-RAY CRYSTALLOGRAPHIC DATA

**Table S1.** Crystallographic Data for [(<sup>Ph</sup>2PEtPDI)Mn]<sub>2</sub> (**2**).

|                                                    | <b>2</b>                                                                                                          |
|----------------------------------------------------|-------------------------------------------------------------------------------------------------------------------|
| chemical formula                                   | C <sub>74</sub> H <sub>74</sub> Mn <sub>2</sub> N <sub>6</sub> P <sub>4</sub> , 4(C <sub>7</sub> H <sub>8</sub> ) |
| formula weight                                     | 1649.68                                                                                                           |
| crystal dimensions                                 | 0.386 x 0.086 x 0.038                                                                                             |
| crystal system                                     | monoclinic                                                                                                        |
| space group                                        | P 1 21/c 1                                                                                                        |
| <i>a</i> (Å)                                       | 14.488(3)                                                                                                         |
| <i>b</i> (Å)                                       | 20.146(5)                                                                                                         |
| <i>c</i> (Å)                                       | 14.872(4)                                                                                                         |
| α (deg)                                            | 90                                                                                                                |
| β (deg)                                            | 95.390(3)                                                                                                         |
| γ (deg)                                            | 90                                                                                                                |
| <i>V</i> (Å <sup>3</sup> )                         | 4321.6(18)                                                                                                        |
| <i>Z</i>                                           | 2                                                                                                                 |
| <i>T</i> (°C)                                      | 123.(2)                                                                                                           |
| ρ <sub>calcd</sub> (g cm <sup>-3</sup> )           | 1.268                                                                                                             |
| μ (mm <sup>-1</sup> )                              | 0.418                                                                                                             |
| reflections collected                              | 33859                                                                                                             |
| data/restraints/parameters                         | 7610/0/518                                                                                                        |
| <i>R</i> <sub>1</sub> [ <i>I</i> > 2σ( <i>I</i> )] | 0.0696                                                                                                            |
| w <i>R</i> <sub>2</sub> (all data)                 | 0.1890                                                                                                            |
| Goodness-of-fit                                    | 1.037                                                                                                             |
| Largest peak, hole (eÅ <sup>-3</sup> )             | 1.123, -0.416                                                                                                     |

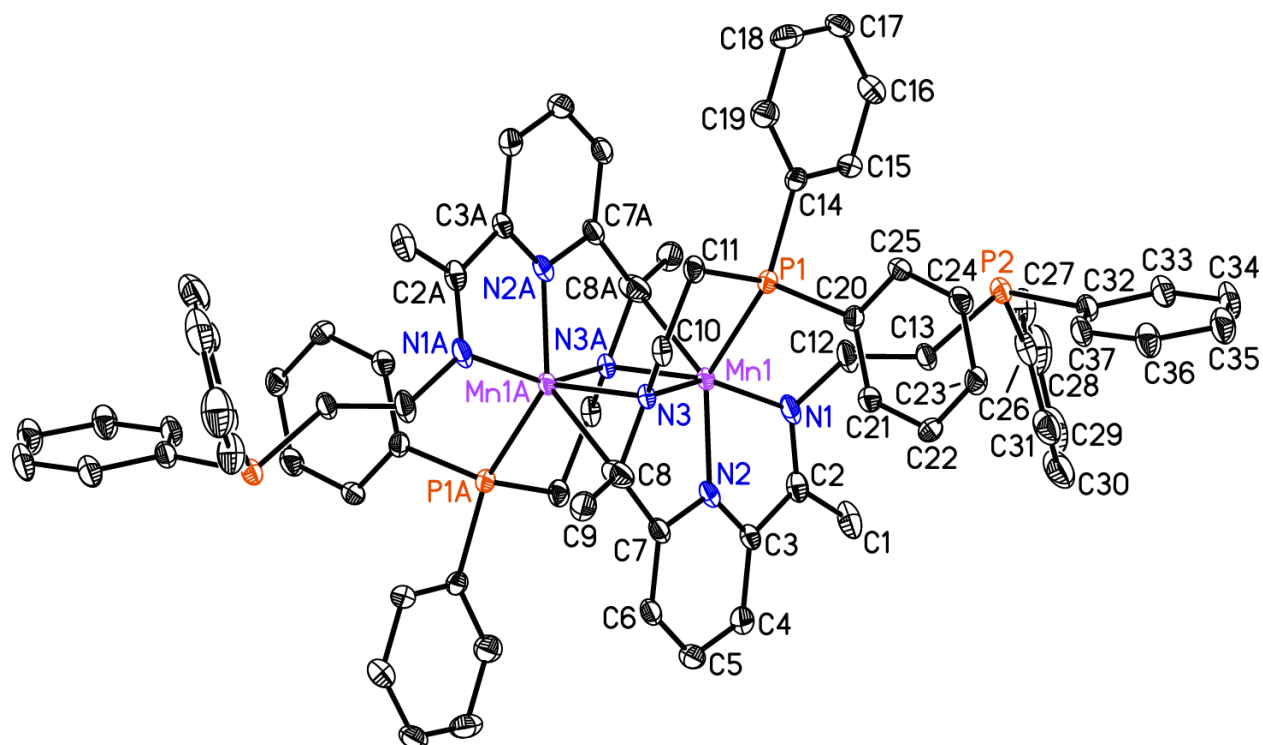

**Figure S3.** The molecular structure of **2** shown at 30% probability ellipsoids. Hydrogen atoms and co-crystallized toluene molecules (4 per dimer) are omitted for clarity.

**Table S2.** Bond distances (Å) and angles (°) determined for **2**.

|              |            |             |           |             |           |
|--------------|------------|-------------|-----------|-------------|-----------|
| Mn1-N2       | 1.947(4)   | N3-Mn1A     | 1.977(4)  | C20-C21     | 1.393(7)  |
| Mn1-N3A      | 1.977(4)   | C1-C2       | 1.495(7)  | C21-C22     | 1.384(6)  |
| Mn1-N1       | 2.022(4)   | C2-C3       | 1.425(7)  | C22-C23     | 1.372(7)  |
| Mn1-N3       | 2.092(4)   | C3-C4       | 1.412(7)  | C23-C24     | 1.369(7)  |
| Mn1-C8A      | 2.233(6)   | C4-C5       | 1.382(7)  | C24-C25     | 1.387(7)  |
| Mn1-P1       | 2.3525(15) | C5-C6       | 1.390(7)  | C26-C31     | 1.380(8)  |
| Mn1-Mn1A     | 2.7889(14) | C6-C7       | 1.378(7)  | C26-C27     | 1.404(8)  |
| P1-C14       | 1.835(5)   | C7-C8       | 1.462(7)  | C27-C28     | 1.373(9)  |
| P1-C20       | 1.842(5)   | C8-C9       | 1.508(7)  | C28-C29     | 1.388(11) |
| P1-C11       | 1.844(5)   | C8-Mn1A     | 2.233(6)  | C29-C30     | 1.354(11) |
| P2-C26       | 1.806(6)   | C10-C11     | 1.517(7)  | C30-C31     | 1.397(9)  |
| P2-C32       | 1.834(5)   | C12-C13     | 1.528(6)  | C32-C37     | 1.377(7)  |
| P2-C13       | 1.849(5)   | C14-C19     | 1.375(7)  | C32-C33     | 1.403(7)  |
| N1-C2        | 1.338(6)   | C14-C15     | 1.383(7)  | C33-C34     | 1.380(8)  |
| N1-C12       | 1.463(6)   | C15-C16     | 1.391(7)  | C34-C35     | 1.371(8)  |
| N2-C7        | 1.367(6)   | C16-C17     | 1.362(8)  | C35-C36     | 1.393(8)  |
| N2-C3        | 1.368(6)   | C17-C18     | 1.361(8)  | C36-C37     | 1.391(7)  |
| N3-C8        | 1.395(6)   | C18-C19     | 1.406(7)  |             |           |
| N3-C10       | 1.456(6)   | C20-C25     | 1.386(7)  |             |           |
|              |            |             |           |             |           |
| N2-Mn1-N3A   | 100.30(15) | C26-P2-C32  | 102.0(2)  | N3-C8-C7    | 113.9(4)  |
| N2-Mn1-N1    | 77.00(16)  | C26-P2-C13  | 100.2(2)  | N3-C8-C9    | 121.6(5)  |
| N3A-Mn1-N1   | 106.59(16) | C32-P2-C13  | 101.5(2)  | C7-C8-C9    | 117.1(5)  |
| N2-Mn1-N3    | 78.82(16)  | C2-N1-C12   | 116.6(5)  | N3-C8-Mn1A  | 60.9(3)   |
| N3A-Mn1-N3   | 93.50(15)  | C2-N1-Mn1   | 116.7(3)  | C7-C8-Mn1A  | 113.7(4)  |
| N1-Mn1-N3    | 150.85(16) | C12-N1-Mn1  | 126.7(4)  | C9-C8-Mn1A  | 117.4(4)  |
| N2-Mn1-C8A   | 137.46(18) | C7-N2-C3    | 121.3(4)  | N3-C10-C11  | 110.6(4)  |
| N3A-Mn1-C8A  | 38.09(17)  | C7-N2-Mn1   | 118.4(3)  | C10-C11-P1  | 107.6(3)  |
| N1-Mn1-C8A   | 102.86(18) | C3-N2-Mn1   | 119.1(3)  | N1-C12-C13  | 110.5(4)  |
| N3-Mn1-C8A   | 105.93(18) | C8-N3-C10   | 120.0(4)  | C12-C13-P2  | 112.4(3)  |
| N2-Mn1-P1    | 129.25(12) | C8-N3-Mn1A  | 81.0(3)   | C19-C14-C15 | 117.3(5)  |
| N3A-Mn1-P1   | 126.39(12) | C10-N3-Mn1A | 121.8(3)  | C19-C14-P1  | 123.3(4)  |
| N1-Mn1-P1    | 103.71(12) | C8-N3-Mn1   | 110.7(3)  | C15-C14-P1  | 119.4(4)  |
| N3-Mn1-P1    | 79.55(11)  | C10-N3-Mn1  | 124.2(3)  | C14-C15-C16 | 121.8(5)  |
| C8A-Mn1-P1   | 92.61(15)  | Mn1A-N3-Mn1 | 86.50(15) | C17-C16-C15 | 119.8(5)  |
| N2-Mn1-Mn1A  | 88.93(12)  | N1-C2-C3    | 113.8(4)  | C18-C17-C16 | 119.9(5)  |
| N3A-Mn1-Mn1A | 48.47(11)  | N1-C2-C1    | 124.4(5)  | C17-C18-C19 | 120.2(5)  |
| N1-Mn1-Mn1A  | 149.02(12) | C3-C2-C1    | 121.9(5)  | C14-C19-C18 | 121.0(5)  |
| N3-Mn1-Mn1A  | 45.03(10)  | N2-C3-C4    | 119.7(4)  | C25-C20-C21 | 118.5(4)  |
| C8A-Mn1-Mn1A | 69.39(14)  | N2-C3-C2    | 111.7(4)  | C25-C20-P1  | 122.8(4)  |
| P1-Mn1-Mn1A  | 106.53(5)  | C4-C3-C2    | 128.6(5)  | C21-C20-P1  | 118.4(4)  |
| C14-P1-C20   | 102.8(2)   | C5-C4-C3    | 118.5(5)  | C22-C21-C20 | 120.3(5)  |
| C14-P1-C11   | 103.5(2)   | C4-C5-C6    | 120.9(5)  | C23-C22-C21 | 120.4(5)  |
| C20-P1-C11   | 101.0(2)   | C7-C6-C5    | 119.5(5)  | C24-C23-C22 | 120.0(5)  |
| C14-P1-Mn1   | 129.95(16) | N2-C7-C6    | 120.1(5)  | C23-C24-C25 | 120.2(5)  |
| C20-P1-Mn1   | 114.22(16) | N2-C7-C8    | 112.8(4)  | C20-C25-C24 | 120.6(5)  |
| C11-P1-Mn1   | 101.29(15) | C6-C7-C8    | 127.1(4)  | C31-C26-C27 | 118.4(6)  |

|             |          |             |          |             |          |
|-------------|----------|-------------|----------|-------------|----------|
| C31-C26-P2  | 124.4(5) | C29-C30-C31 | 119.5(7) | C34-C33-C32 | 120.6(5) |
| C27-C26-P2  | 117.2(5) | C26-C31-C30 | 120.8(7) | C35-C34-C33 | 121.1(5) |
| C28-C27-C26 | 120.5(7) | C37-C32-C33 | 117.7(5) | C34-C35-C36 | 119.3(5) |
| C27-C28-C29 | 119.6(8) | C37-C32-P2  | 123.5(4) | C37-C36-C35 | 119.3(6) |
| C30-C29-C28 | 121.1(7) | C33-C32-P2  | 118.7(4) | C32-C37-C36 | 121.9(5) |

## CATALYTIC TRIALS

**Hydrosilylation of benzaldehyde catalyzed by 0.05 mol% **2** (0.1 mol% relative to Mn):** In the glove box, a neat mixture of PhSiH<sub>3</sub> (0.347 mL, 2.81 mmol) and benzaldehyde (0.286 mL, 2.81 mmol) was added to 0.0018 g (0.0014 mmol) of **2** pre-weighed into a 20 mL vial. The resulting red solution vigorously bubbled and became hot. It was stirred for 2 min and then exposed to air to deactivate the catalyst. The colorless solution was filtered through Celite and a <sup>1</sup>H NMR spectrum was recorded to determine the percent conversion. The products were hydrolyzed with 2 mL aqueous 10% NaOH at room temperature for 2 h. The organic fraction was extracted with diethyl ether (3 x 4 mL) and the organic layer was dried over anhydrous Na<sub>2</sub>SO<sub>4</sub>. Removal of the solvent on a rotavap afforded a colorless oil identified as benzyl alcohol (0.281 g, 2.61 mmol, yield = 93%). <sup>1</sup>H NMR (benzene-*d*<sub>6</sub>): 7.08-7.15 (5H, m, *phenyl*), 4.32 (2H, s, -CH<sub>2</sub>OH). {<sup>1</sup>H} <sup>13</sup>C NMR (benzene-*d*<sub>6</sub>): 142.14, 128.91, 127.80, 127.42, 65.26.<sup>1</sup>

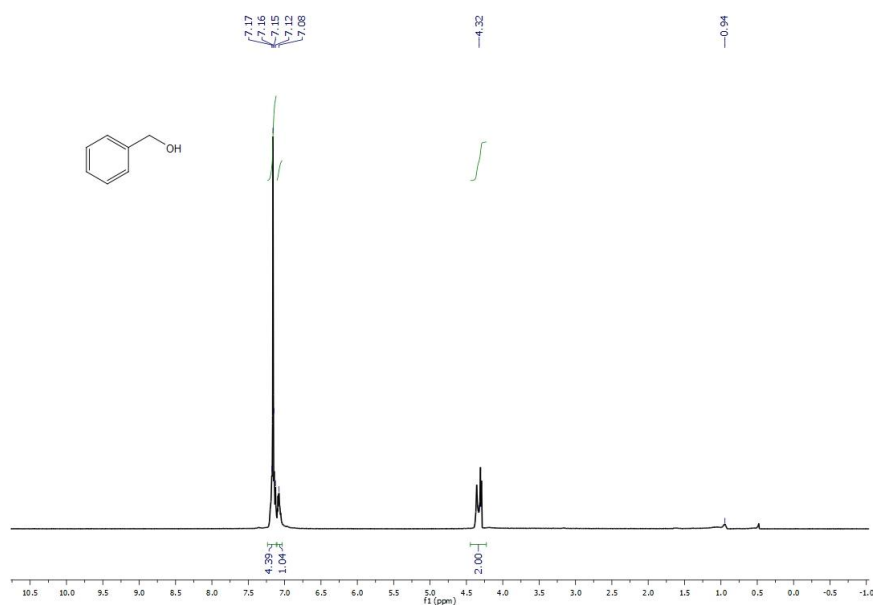

**Figure S4:** <sup>1</sup>H NMR spectrum of benzyl alcohol in benzene-*d*<sub>6</sub>.

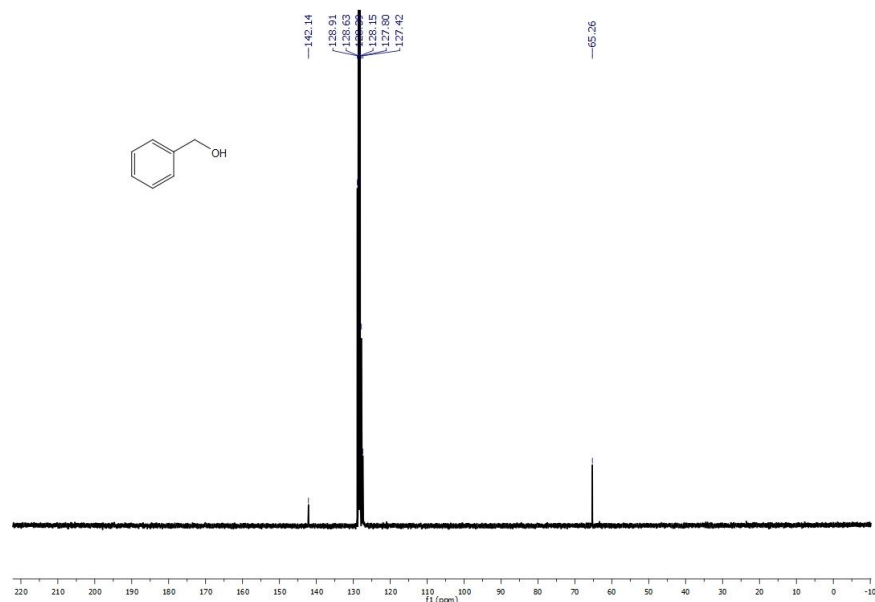

**Figure S5:**  $\{^1\text{H}\}^{13}\text{C}$  NMR spectrum of benzyl alcohol in benzene- $d_6$ .

**Hydrosilylation of 4-fluorobenzaldehyde catalyzed by 0.05 mol% **2** (0.1 mol% relative to **Mn**):** In the glove box, a neat mixture of  $\text{PhSiH}_3$  (0.365 mL, 2.96 mmol) and 4-fluorobenzaldehyde (0.319 mL, 2.96 mmol) was added to 0.0019 g (0.0015 mmol) of **2** pre-weighed in a 20 mL vial. The resulting brown solution vigorously bubbled and became hot. It was stirred for 2 min and then exposed to air to deactivate the catalyst. The colorless solution was filtered through Celite and a  $^1\text{H}$  NMR spectrum was recorded to determine the percent conversion. The products were hydrolyzed with 2 mL aqueous 10% NaOH at room temperature for 2 h. The organic fraction was extracted with diethyl ether (3 x 4 mL) and the organic layer was dried over anhydrous  $\text{Na}_2\text{SO}_4$ . Removal of the solvent on a rotavap afforded a colorless oil identified as 4-fluorobenzyl alcohol (0.334 g, 2.64 mmol, yield = 90%).  $^1\text{H}$  NMR (benzene- $d_6$ ): 6.95 (2H, d, *phenyl*), 6.79 (2H, d, *phenyl*), 4.21 (2H, s,  $-\text{CH}_2\text{OH}$ ).  $\{^1\text{H}\}^{13}\text{C}$  NMR (benzene- $d_6$ ): 162.91 (d,  $^1J_{\text{CF}} = 244$  Hz), 137.57, 129.16 (d,  $^3J_{\text{CF}} = 8$  Hz), 115.68 (d,  $^2J_{\text{CF}} = 21$  Hz), 64.34.<sup>1</sup>



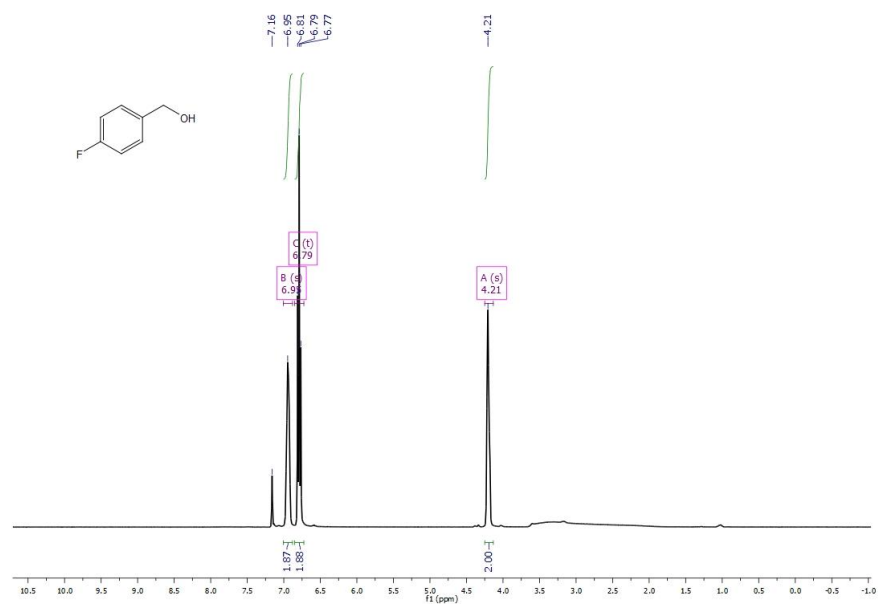

**Figure S6:** <sup>1</sup>H NMR spectrum of 4-fluorobenzyl alcohol in benzene-*d*<sub>6</sub>.

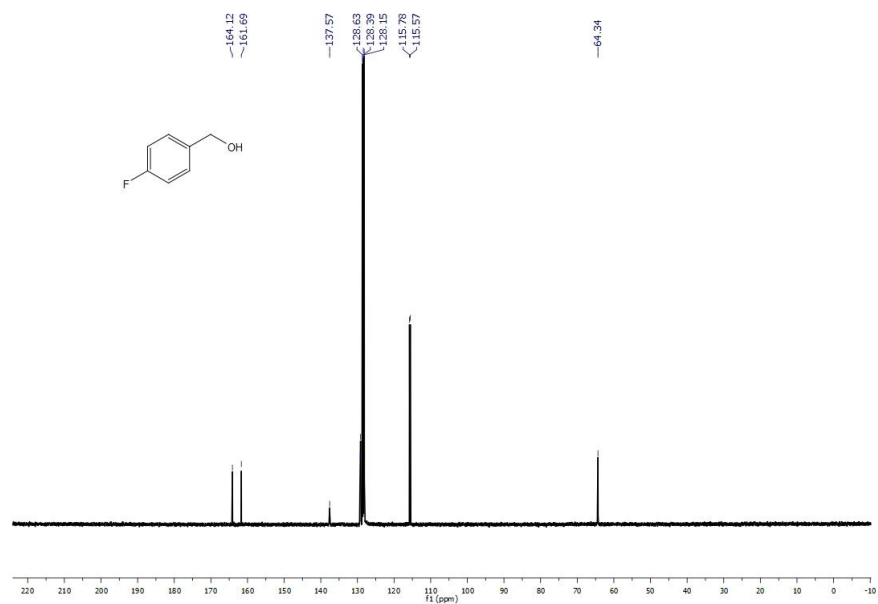

**Figure S7:** {<sup>1</sup>H}<sup>13</sup>C NMR spectrum of 4-fluorobenzyl alcohol in benzene-*d*<sub>6</sub>.

**Hydrosilylation of 4-chlorobenzaldehyde catalyzed by 0.05 mol% **2** (0.1 mol% relative to **Mn**):** In the glove box, a mixture of PhSiH<sub>3</sub> (0.424 mL, 3.43 mmol) and 4-chlorobenzaldehyde (0.483 g, 3.43 mmol) in 0.5 mL of diethyl ether was added to 0.0022 g (0.0017 mmol) of **2** pre-weighed into a 20 mL vial. The resulting red solution vigorously bubbled and became hot. It was stirred for 2 min and then exposed to air to deactivate the catalyst. The colorless solution was filtered through Celite and a <sup>1</sup>H NMR spectrum was recorded to determine the percent conversion. It was followed by a hydrolytic work up whereby the mixture was stirred with 2 mL aqueous 10% NaOH solution at room temperature for 2 h. The organic fraction was extracted with diethyl ether (3 x 4 mL) and the organic layer was dried over anhydrous Na<sub>2</sub>SO<sub>4</sub>. Removal of the solvent on a rotavap afforded a white solid identified as 4-chlorobenzyl alcohol (0.405 g, 2.83 mmol, yield = 83%). <sup>1</sup>H NMR (benzene-*d*<sub>6</sub>): 7.08 (2H, d, *phenyl*), 6.83 (2H, d, *phenyl*), 4.10 (2H, s, -CH<sub>2</sub>OH). {<sup>1</sup>H}<sup>13</sup>C NMR (benzene-*d*<sub>6</sub>): 140.50, 133.60, 129.02, 128.63, 64.41. Melting Point: 71.1-72.3 °C (colorless crystalline solid).<sup>1</sup>

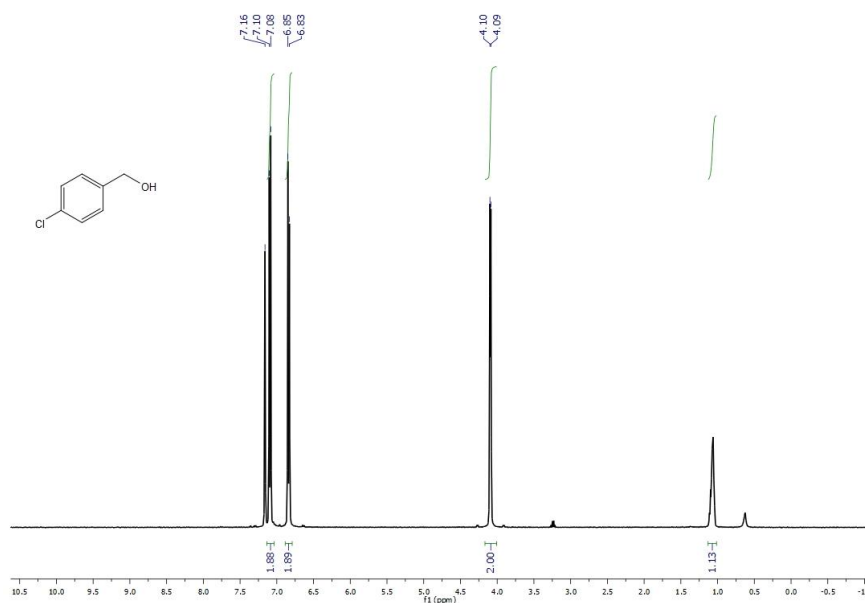

**Figure S8:** <sup>1</sup>H NMR spectrum of 4-chlorobenzyl alcohol in benzene-*d*<sub>6</sub>.

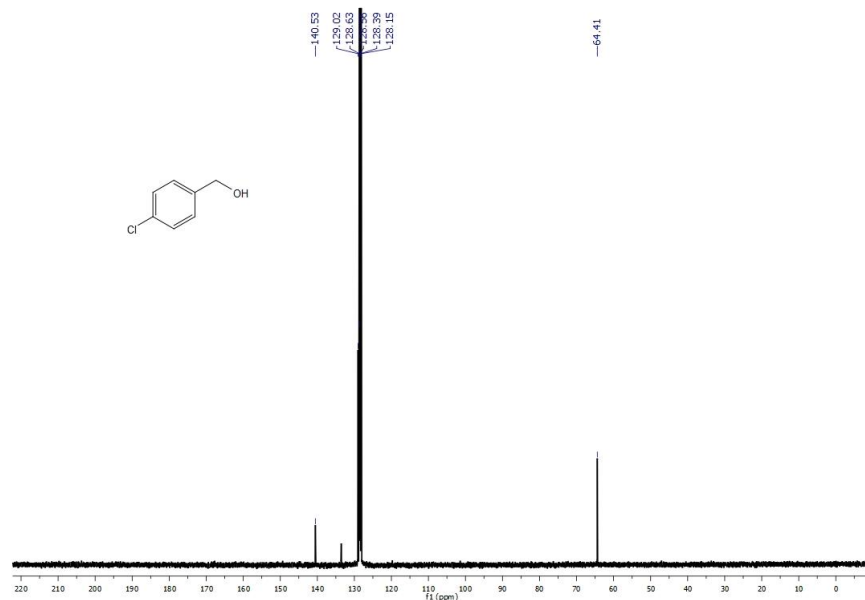

**Figure S9:**  $\{^1\text{H}\}^{13}\text{C}$  NMR spectrum of 4-chlorobenzyl alcohol in benzene- $d_6$ .

**Hydrosilylation of 4-bromobenzaldehyde catalyzed by 0.05 mol% **2** (0.1 mol% relative to **Mn**):** In the glove box, a mixture of  $\text{PhSiH}_3$  (0.424 mL, 3.43 mmol) and 4-bromobenzaldehyde (0.635 g, 3.43 mmol) in 0.5 mL diethyl ether was added to 0.0022 g (0.0017 mmol) of **2** pre-weighed into a 20 mL vial. The resulting brown solution vigorously bubbled and became hot. It was stirred for 2 min and then exposed to air to deactivate the catalyst. The colorless solution was filtered through Celite and a  $^1\text{H}$  NMR spectrum was recorded to determine the percent conversion. It was followed by a hydrolytic work up whereby the mixture was stirred with 2 mL aqueous 10% NaOH solution at room temperature for 2 h. The organic fraction was extracted with diethyl ether (3 x 4 mL) and the organic layer was dried over anhydrous  $\text{Na}_2\text{SO}_4$ . Removal of the solvent on a rotavap afforded a white solid identified as 4-bromobenzyl alcohol (0.536 g, 2.87 mmol, yield = 83%).  $^1\text{H}$  NMR (benzene- $d_6$ ): 7.23 (2H, d, *phenyl*), 6.76 (2H, d, *phenyl*), 4.07 (2H, s,  $-\text{CH}_2\text{OH}$ ), 1.36 (1H, s,  $-\text{CH}_2\text{OH}$ ).  $\{^1\text{H}\}^{13}\text{C}$  NMR (benzene- $d_6$ ): 140.94, 131.50, 121.66, 64.41, one resonance not located. Melting Point: 77.1-78.4 °C (colorless crystalline solid).<sup>1</sup>

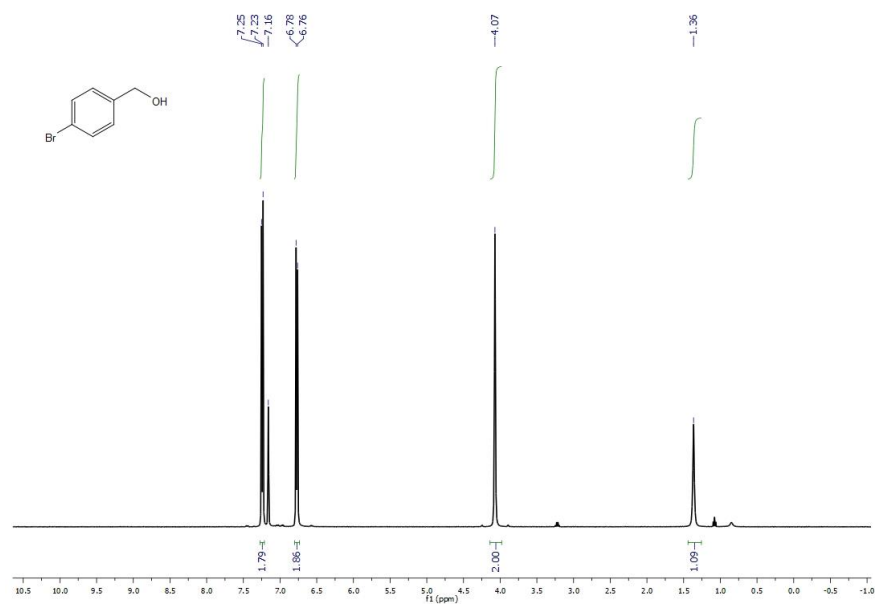

**Figure S10:**  $^1\text{H}$  NMR spectrum of 4-bromobenzyl alcohol in benzene- $d_6$ .

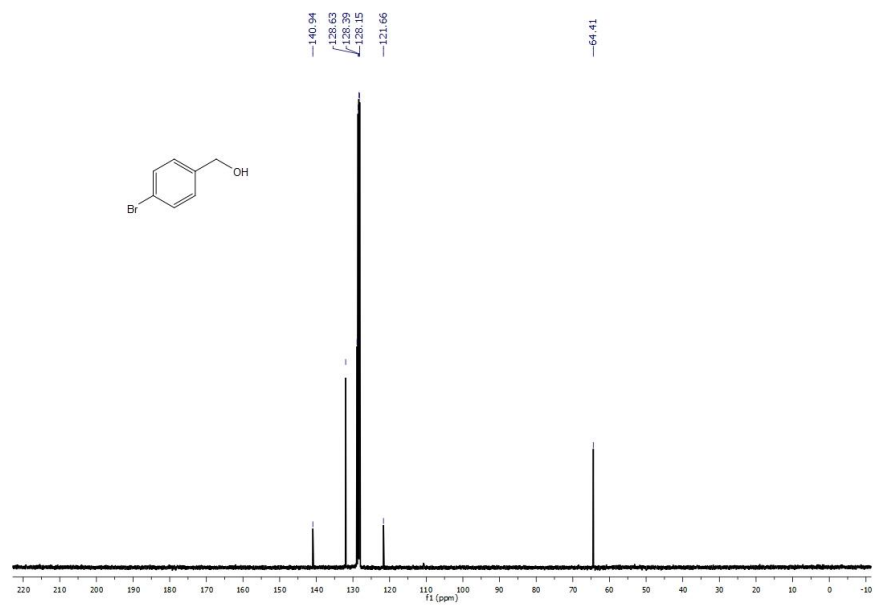

**Figure S11:**  $\{^1\text{H}\}^{13}\text{C}$  NMR spectrum of 4-bromobenzyl alcohol in benzene- $d_6$ .

**Attempt to hydrosilylate 4-iodobenzaldehyde using 0.05 mol% **2** (0.1 mol% relative to Mn):**

In the glove box, a mixture of PhSiH<sub>3</sub> (0.385 mL, 3.12 mmol) and 4-iodobenzaldehyde (0.724 g, 3.12 mmol) in 0.5 mL toluene was added to 0.002 g (0.0016 mmol) of **2** pre-weighed into a 20 mL vial. The resulting solution was stirred for 2 min and then exposed to air to deactivate the catalyst. The solution was then filtered through Celite and <sup>1</sup>H NMR spectroscopy revealed no conversion.

**Hydrosilylation of 2-nitrobenzaldehyde catalyzed by 0.05 mol% **2** (0.1 mol% relative to Mn):**

In the glove box, a neat mixture of PhSiH<sub>3</sub> (0.327 mL, 2.65 mmol) and 2-nitrobenzaldehyde (0.400 g, 2.65 mmol) was added to 0.0017 g (0.0013 mmol) of **2** pre-weighed into a 20 mL vial. The resulting brown solution vigorously bubbled and became hot. It was stirred for 2 min and then exposed to air to deactivate the catalyst. The colorless solution was filtered through Celite and a <sup>1</sup>H NMR spectrum was recorded to determine the percent conversion. It was followed by a hydrolytic work up whereby the mixture was stirred with 2 mL aqueous 10% NaOH solution at room temperature for 2 h. The organic fraction was extracted with diethyl ether (3 x 4 mL) and the organic layer was dried over anhydrous Na<sub>2</sub>SO<sub>4</sub>. Removal of the diethyl ether on a rotavap afforded a pale yellow solid identified as 2-nitrobenzyl alcohol (0.322 g, 2.17 mmol, yield = 79%). <sup>1</sup>H NMR (benzene-*d*<sub>6</sub>): 7.62 (1H, d, *phenyl*), 7.35 (1H, d, *phenyl*), 6.91 (1H, d, *phenyl*), 6.64 (1H, d, *phenyl*), 4.54 (2H, s, -CH<sub>2</sub>OH), 1.52 (1H, s, -CH<sub>2</sub>OH). {<sup>1</sup>H}<sup>13</sup>C NMR (benzene-*d*<sub>6</sub>): 137.98, 133.68, 129.20, 127.99, 124.95, 62.27. Melting Point: 70.3-72.1 °C (orange crystalline solid).<sup>1</sup>

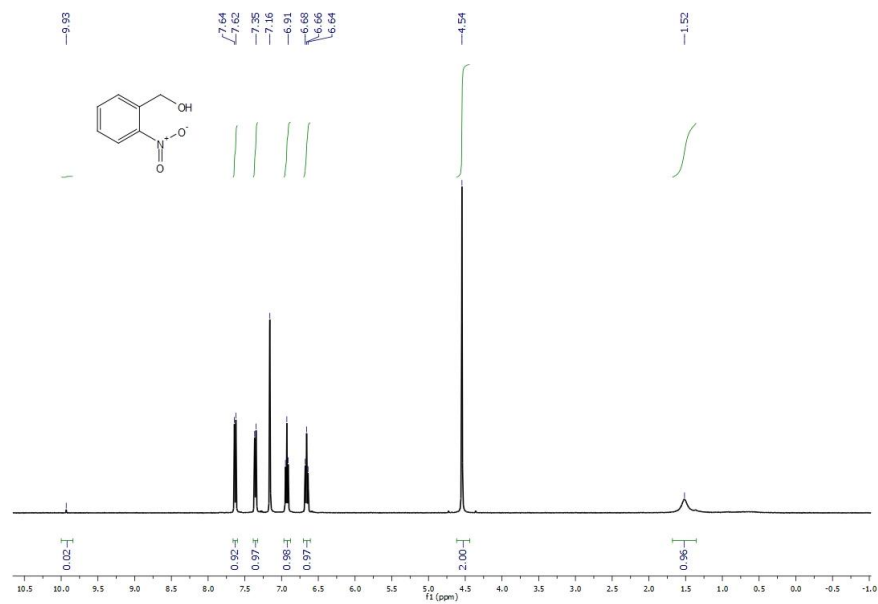

**Figure S12:** <sup>1</sup>H NMR spectrum of 2-nitrobenzyl alcohol in benzene-*d*<sub>6</sub>.

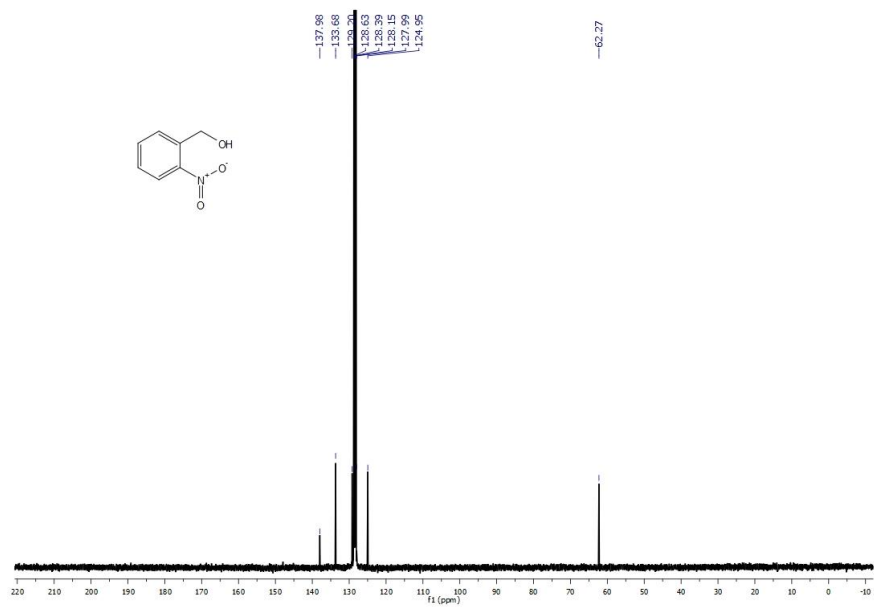

**Figure S13:** {<sup>1</sup>H} <sup>13</sup>C NMR spectrum of 2-nitrobenzyl alcohol in benzene-*d*<sub>6</sub>.

**Hydrosilylation of 4-cyanobenzaldehyde catalyzed by 0.05 mol% **2** (0.1 mol% relative to **Mn**):** In the glove box, a mixture of PhSiH<sub>3</sub> (0.347 mL, 2.81 mmol) and 4-cyanobenzaldehyde (0.368 g, 2.81 mmol) was added to 0.0018 g (0.0014 mmol) of **2** pre-weighed into a 20 mL vial. The resulting brown solution vigorously bubbled and became hot. It was stirred for 2 min and then exposed to air to deactivate the catalyst. The colorless solution was filtered through Celite and a <sup>1</sup>H NMR spectrum was recorded to determine the percent conversion. It was followed by a hydrolytic work up whereby the mixture was stirred with 2 mL aqueous 10% NaOH solution at room temperature for 2 h. The organic fraction was extracted with diethyl ether (3 x 4 mL) and the organic layer was dried over anhydrous Na<sub>2</sub>SO<sub>4</sub>. Removal of the diethyl ether on a rotavap afforded a white solid identified as 4-cyanobenzyl alcohol (0.266 g, 1.997 mmol, yield = 71%). <sup>1</sup>H NMR (benzene-*d*<sub>6</sub>): 7.00 (2H, d, *phenyl*), 6.77 (2H, d, *phenyl*), 4.03 (2H, s, -CH<sub>2</sub>OH), 1.23 (1H, s, -CH<sub>2</sub>OH). {<sup>1</sup>H}<sup>13</sup>C NMR (benzene-*d*<sub>6</sub>): 146.84, 132.37, 127.02, 119.32, 111.65, 110.69, 63.96. Melting Point: 34.1-37.4 °C (yellow crystalline solid).<sup>1</sup>

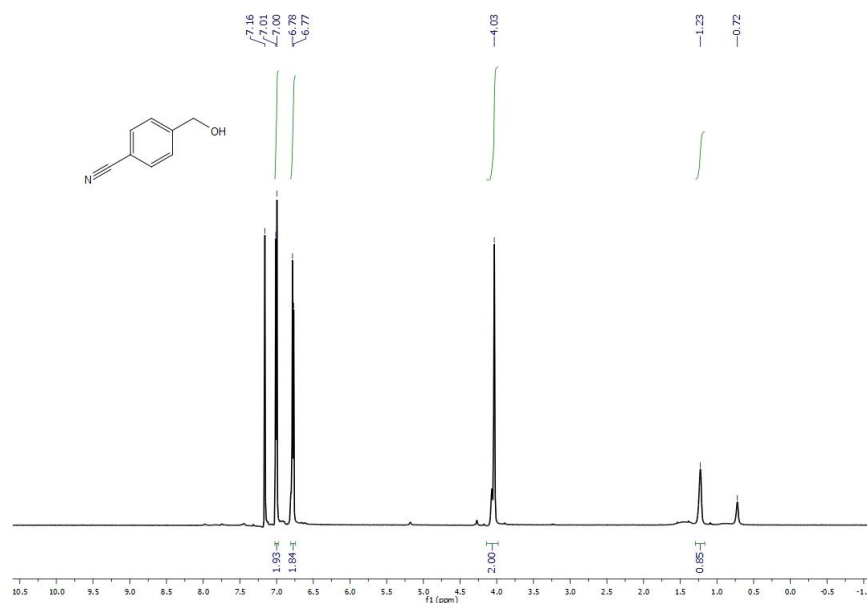

**Figure S14:** <sup>1</sup>H NMR spectrum of 4-cyanobenzyl alcohol in benzene-*d*<sub>6</sub>.

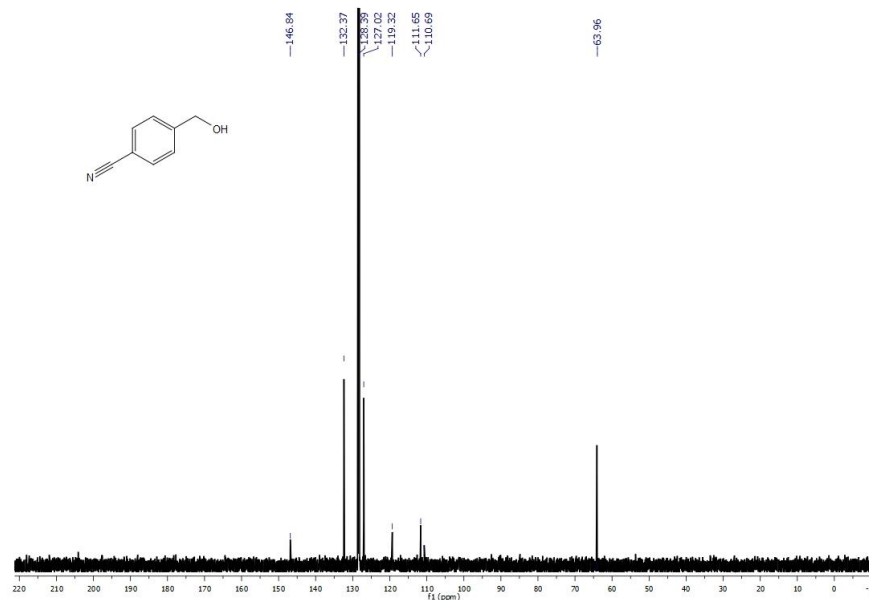

**Figure S15:**  $\{^1\text{H}\}^{13}\text{C}$  NMR spectrum of 4-cyanobenzyl alcohol in benzene- $d_6$ .

**Hydrosilylation of *p*-anisaldehyde catalyzed by 0.05 mol% **2** (0.1 mol% relative to Mn):** In the glove box, a neat mixture of  $\text{PhSiH}_3$  (0.424 mL, 3.43 mmol) and *p*-anisaldehyde (0.393 mL, 3.43 mmol) was added to 0.0022 g (0.0017 mmol) of **2** pre-weighed in a 20 mL vial. The resulting brown solution vigorously bubbled and became hot. It was stirred for 2 min and then exposed to air to deactivate the catalyst. The colorless solution was filtered through Celite and a  $^1\text{H}$  NMR spectrum was recorded to determine the percent conversion. It was followed by a hydrolytic work up whereby the mixture was stirred with 2 mL aqueous 10% NaOH solution at room temperature for 2 h. The organic fraction was extracted with diethyl ether (3 x 4 mL) and the organic layer was dried over anhydrous  $\text{Na}_2\text{SO}_4$ . Removal of the diethyl ether on a rotavap afforded a colorless oil identified as 4-methoxybenzyl alcohol (0.406 g, 2.94 mmol, yield = 86%).  $^1\text{H}$  NMR (benzene- $d_6$ ): 7.13 (2H, d, *phenyl*), 6.76 (2H, d, *phenyl*), 4.38 (2H, s,  $-\text{CH}_2\text{OH}$ ), 3.31 (3H, s,  $-\text{OCH}_3$ ), 2.56 (1H, s,  $-\text{CH}_2\text{OH}$ ).  $\{^1\text{H}\}^{13}\text{C}$  NMR (benzene- $d_6$ ): 159.85, 134.35, 114.44, 65.01, 55.15.<sup>1</sup>



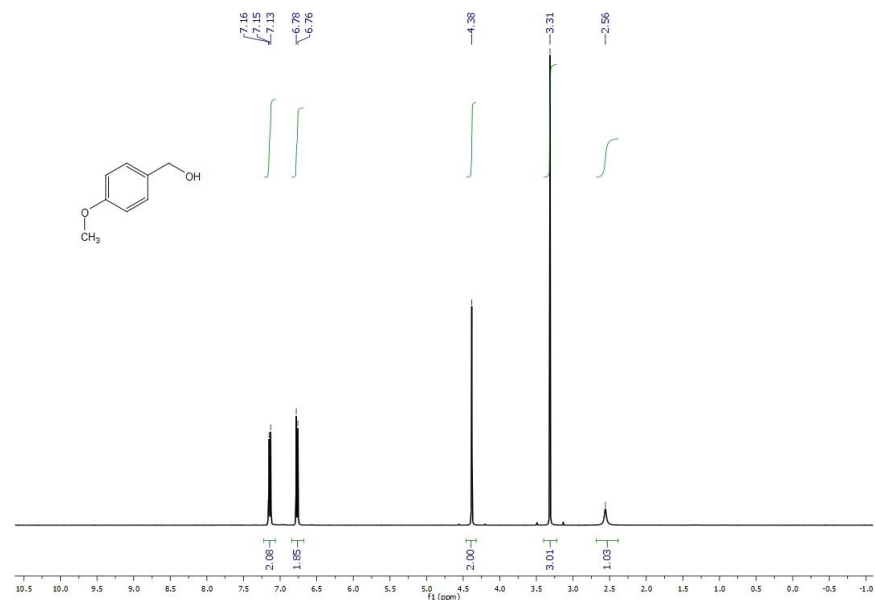

**Figure S16:** <sup>1</sup>H NMR spectrum of 4-methoxybenzyl alcohol in benzene-*d*<sub>6</sub>.

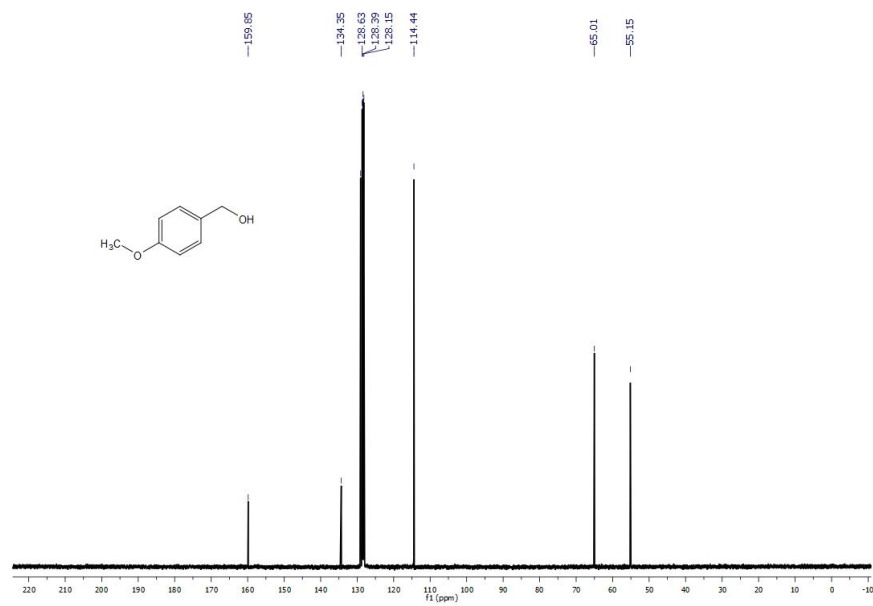

**Figure S17:** {<sup>1</sup>H}<sup>13</sup>C NMR spectrum of 4-methoxybenzyl alcohol in benzene-*d*<sub>6</sub>.

**Hydrosilylation of *p*-tolualdehyde catalyzed by 0.05 mol% **2** (0.1 mol% relative to Mn):** In the glove box, a neat mixture of PhSiH<sub>3</sub> (0.347 mL, 2.81 mmol) and *p*-tolualdehyde (0.331 mL, 2.81 mmol) was added to 0.0018 g (0.0014 mmol) of **2** pre-weighed into a 20 mL vial. The resulting brown solution vigorously bubbled and became hot. It was stirred for 2 min and then exposed to air to deactivate the catalyst. The colorless solution was filtered through Celite and a <sup>1</sup>H NMR spectrum was recorded to determine the percent conversion. It was followed by a hydrolytic work up whereby the mixture was stirred with 2 mL aqueous 10% NaOH solution at room temperature for 2 h. The organic fraction was extracted with diethyl ether (3 x 4 mL) and the organic layer was dried over anhydrous Na<sub>2</sub>SO<sub>4</sub>. Removal of the diethyl ether on a rotavap afforded a white solid identified as 4-methylbenzyl alcohol (0.303 g, 2.48 mmol, yield = 88%). <sup>1</sup>H NMR (benzene-*d*<sub>6</sub>): 7.11 (2H, d, *phenyl*), 6.98 (2H, d, *phenyl*), 4.35 (2H, s, -CH<sub>2</sub>OH), 2.12 (3H, s, -CH<sub>3</sub>), 1.48 (1H, s, -CH<sub>2</sub>OH). {<sup>1</sup>H}<sup>13</sup>C NMR (benzene-*d*<sub>6</sub>): 139.35, 137.20, 129.62, 127.52, 65.29, 21.46. Melting Point: 59.9-61.2 °C (colorless crystalline solid).<sup>1</sup>

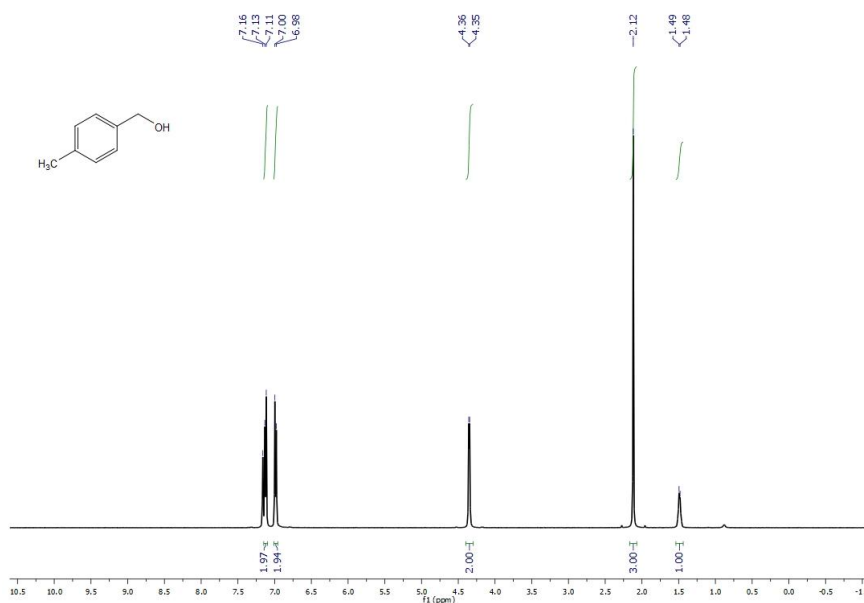

**Figure S18:** <sup>1</sup>H NMR spectrum of 4-methylbenzyl alcohol in benzene-*d*<sub>6</sub>.

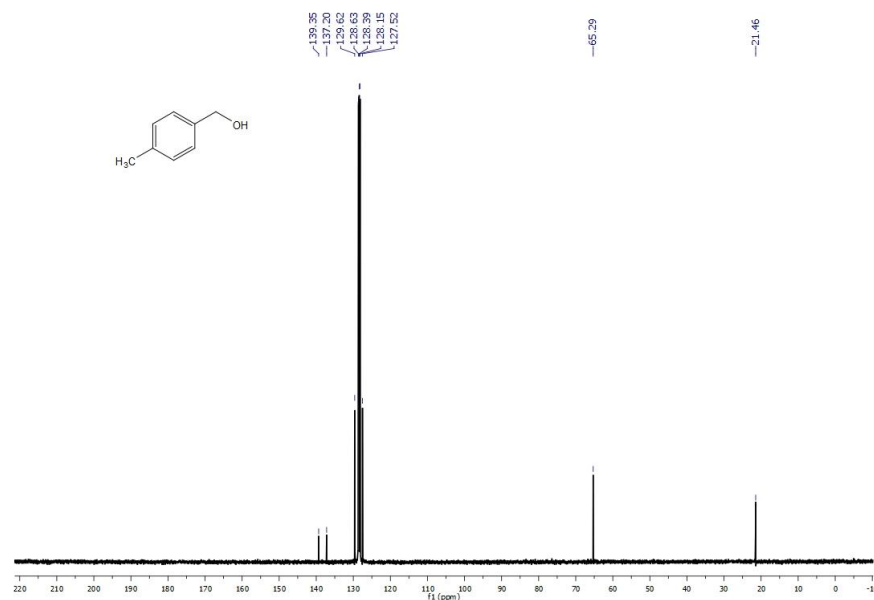

**Figure S19:**  $\{^1\text{H}\}^{13}\text{C}$  NMR spectrum of 4-methylbenzyl alcohol in benzene- $d_6$ .

**Hydrosilylation of 2-naphthaldehyde catalyzed by 0.05 mol% **2** (0.1 mol% relative to Mn):**

In the glove box, a mixture of  $\text{PhSiH}_3$  (0.289 mL, 2.34 mmol) and 2-naphthaldehyde (0.365 g, 2.34 mmol) in 0.5 mL toluene was added to 0.0015 g (0.0012 mmol) of **2** pre-weighed into a 20 mL vial. The resulting brown solution vigorously bubbled and became hot. It was stirred for 2 min and then exposed to air to deactivate the catalyst. The colorless solution was filtered through Celite and a  $^1\text{H}$  NMR spectrum was recorded to determine the percent conversion. It was followed by a hydrolytic work up whereby the mixture was stirred with 2 mL aqueous 10% NaOH solution at room temperature for 2 h. The organic fraction was extracted with diethyl ether (3 x 4 mL) and the organic layer was dried over anhydrous  $\text{Na}_2\text{SO}_4$ . Removal of the diethyl ether on a rotavap afforded a white solid identified as 2-naphthalenemethanol (0.344 g, 2.18 mmol, yield = 93%).  $^1\text{H}$  NMR (benzene- $d_6$ ): 8.01-7.96 (1H, m, *phenyl*), 7.68 (1H, s, *phenyl*), 7.52-7.47 (1H, m, *phenyl*), 7.38 (1H, m, *phenyl*), 7.26 (1H, d, *phenyl*), 7.20 (2H, m, *phenyl*), 5.04 (2H, s,  $-\text{CH}_2\text{OH}$ ), 4.45 (1H, s,  $-\text{CH}_2\text{OH}$ ).  $\{^1\text{H}\}^{13}\text{C}$  NMR (benzene- $d_6$ ): 138.37, 135.86, 134.27, 133.78, 131.46, 131.10, 126.61, 126.31, 126.08, 125.75, 66.03. Melting Point: 79.5-80.6  $^\circ\text{C}$  (colorless crystalline solid).<sup>1</sup>

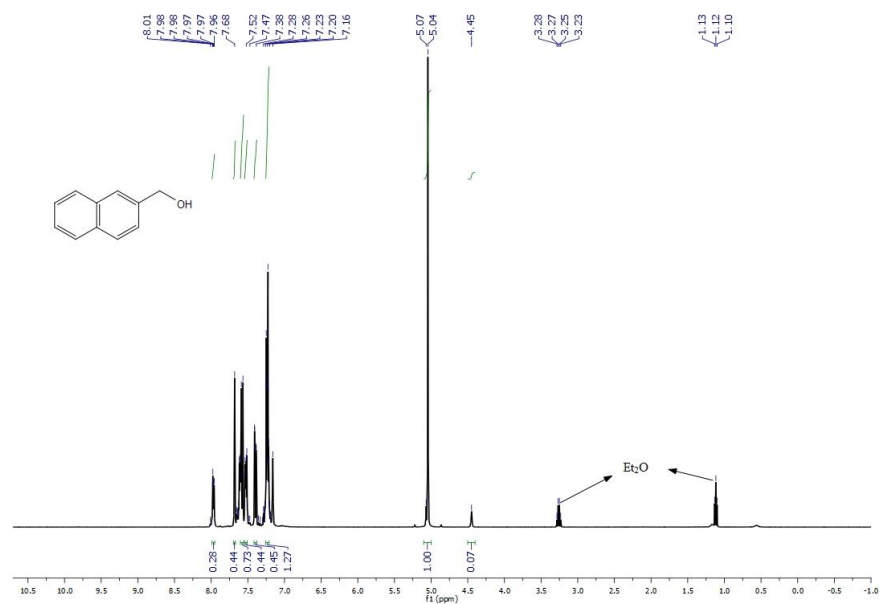

**Figure S20:** <sup>1</sup>H NMR spectrum of 2-naphthalenemethanol in benzene-*d*<sub>6</sub>.

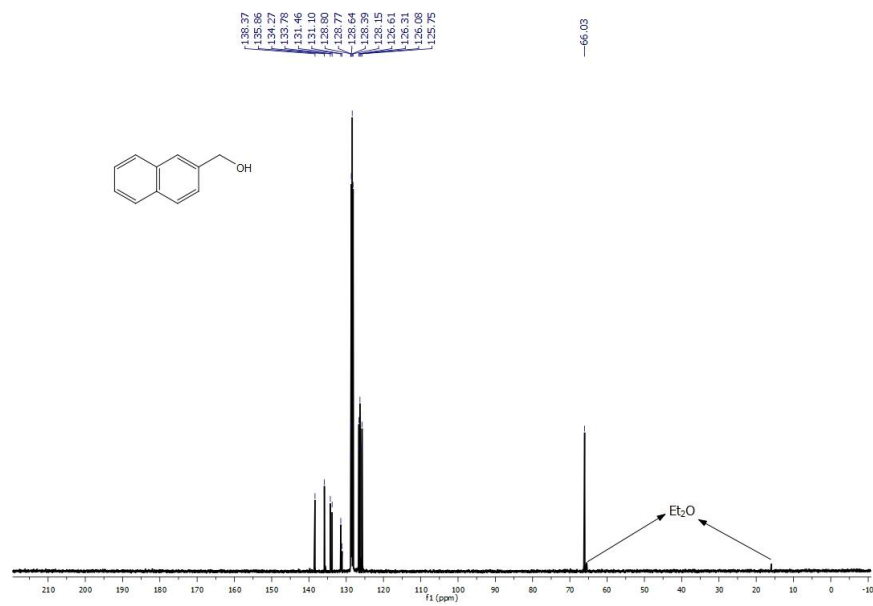

**Figure S21:** {<sup>1</sup>H}<sup>13</sup>C NMR spectrum of 2-naphthalenemethanol in benzene-*d*<sub>6</sub>.



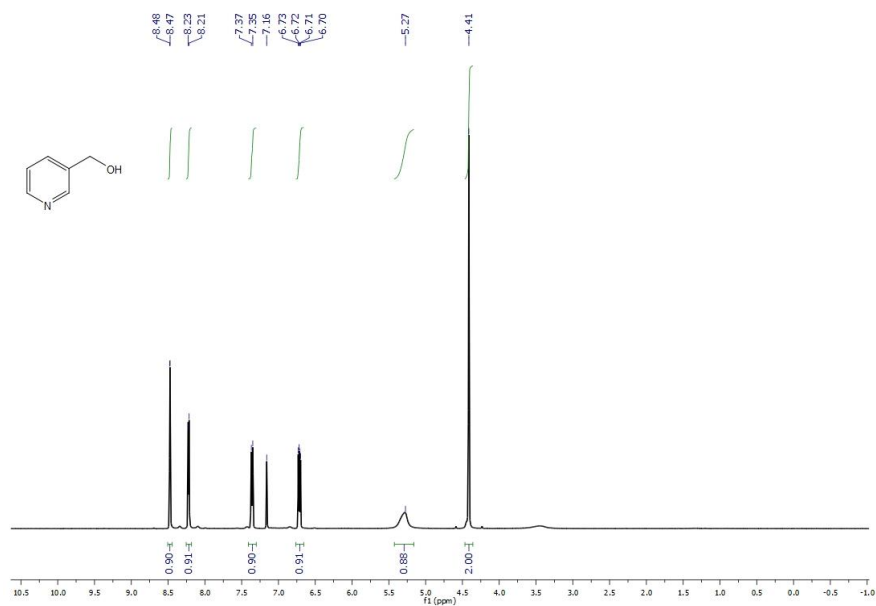

**Figure S23:**  $^1\text{H}$  NMR spectrum of isolated pyridine-3-carbinol in benzene- $d_6$ .

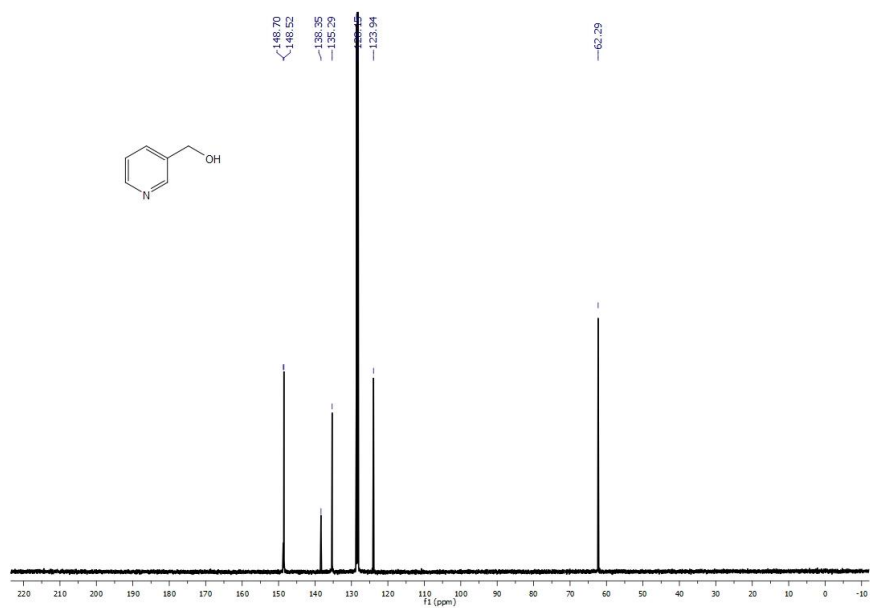

**Figure S24:**  $\{^1\text{H}\}^{13}\text{C}$  NMR spectrum of isolated pyridine-3-carbinol in benzene- $d_6$ .

**Hydrosilylation of furfural catalyzed by 0.05 mol% **2** (0.1 mol% relative to Mn):** In the glove box, a neat mixture of PhSiH<sub>3</sub> (0.327 mL, 2.65 mmol) and furfural (0.219 mL, 2.65 mmol) was added to 0.0017 g (0.0013 mmol) of **2** pre-weighed into a 20 mL vial. The resulting brown solution vigorously bubbled and became hot. It was stirred for 2 min and then exposed to air to deactivate the catalyst. The colorless solution was filtered through Celite and a <sup>1</sup>H NMR spectrum was recorded to determine the percent conversion. It was followed by a hydrolytic work up whereby the mixture was stirred with 2 mL aqueous 10% NaOH at room temperature for 2 h. The organic fraction was extracted with diethyl ether (3 x 4 mL) and the organic layer was dried over anhydrous Na<sub>2</sub>SO<sub>4</sub>. Removal of the diethyl ether on a rotavap afforded a yellow oil identified as furfuryl alcohol (0.1998 g, 2.04 mmol, yield = 77%). <sup>1</sup>H NMR (benzene-*d*<sub>6</sub>): 7.06 (1H, d, *furfuryl*), 6.02 (1H, m, *furfuryl*), 5.95 (1H, d, *furfuryl*), 4.22 (2H, s, -CH<sub>2</sub>OH), 1.28 (1H, br, -CH<sub>2</sub>OH). <sup>13</sup>C NMR (benzene-*d*<sub>6</sub>): 154.81, 142.64, 110.84, 108.01, 57.78.<sup>1</sup>

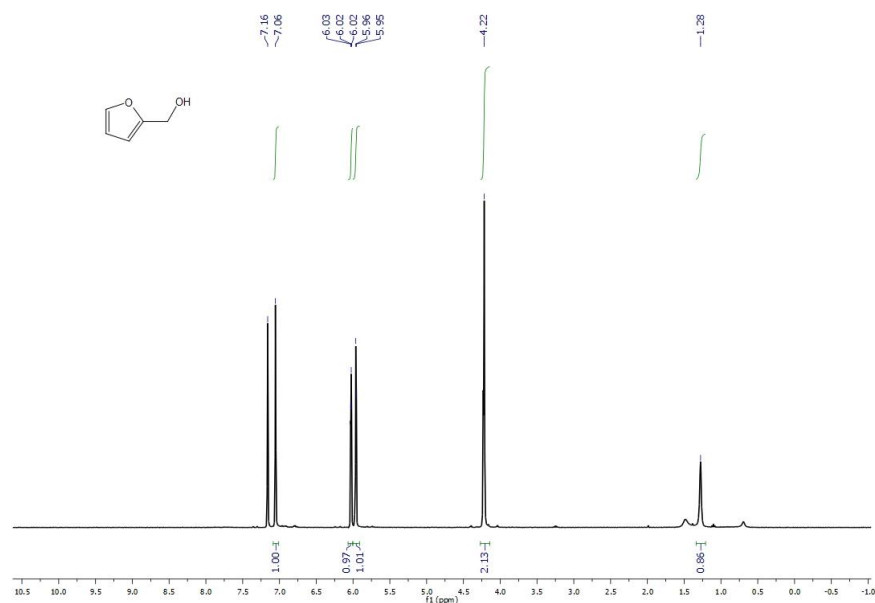

**Figure S25:** <sup>1</sup>H NMR spectrum of furfuryl alcohol in benzene-*d*<sub>6</sub>.

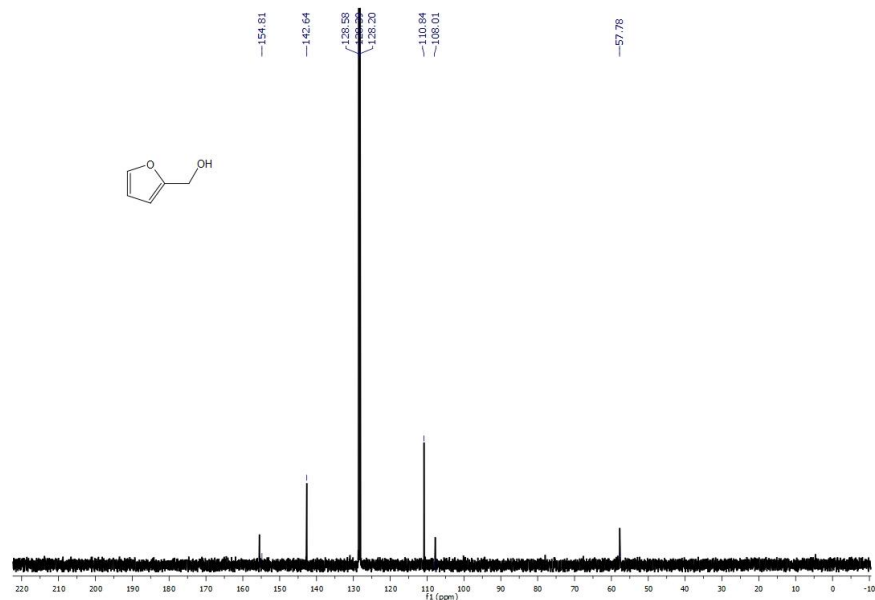

**Figure S26:**  $\{^1\text{H}\}^{13}\text{C}$  NMR spectrum of furfuryl alcohol in benzene- $d_6$ .

**Hydrosilylation of 3-cyclohexene-1-carboxaldehyde using 0.05 mol% **2** (0.1 mol% relative to Mn):** In the glove box, a neat mixture of  $\text{PhSiH}_3$  (0.424 mL, 3.43 mmol) and 3-cyclohexene-1-carboxaldehyde (0.389 mL, 3.43 mmol) was added to 0.0022 g (0.0017 mmol) of **2** pre-weighed in a 20 mL vial. The resulting brown solution became warm. It was stirred for 2 min and then exposed to air to deactivate the catalyst. The colorless solution was filtered through Celite and a  $^1\text{H}$  NMR spectrum was recorded, which revealed 32% conversion to the quaternary silane product.



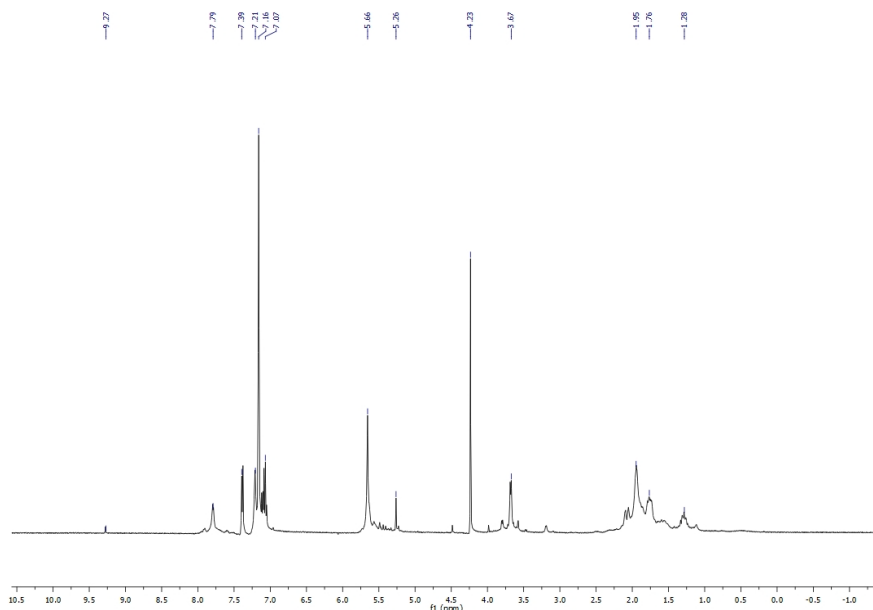

**Figure S27:**  $^1\text{H}$  NMR spectrum showing partial 3-cyclohexene-1-carboxaldehyde hydrosilylation in benzene- $d_6$ .

**Hydrosilylation of citral using 0.05 mol% **2** (0.1 mol% relative to Mn):** In the glove box, a mixture of  $\text{PhSiH}_3$  (0.347 mL, 2.81 mmol) and citral (0.480 mL, 2.81 mmol) was added to 0.0018 g (0.0014 mmol) of **2** pre-weighed into a 20 mL vial. The resulting brown solution became warm. It was stirred for 2 min and then exposed to air to deactivate the catalyst. The colorless solution was filtered through Celite and a  $^1\text{H}$  NMR spectrum was recorded, which showed only 18% conversion made up of 84% quaternary silane and 16% tertiary silane.

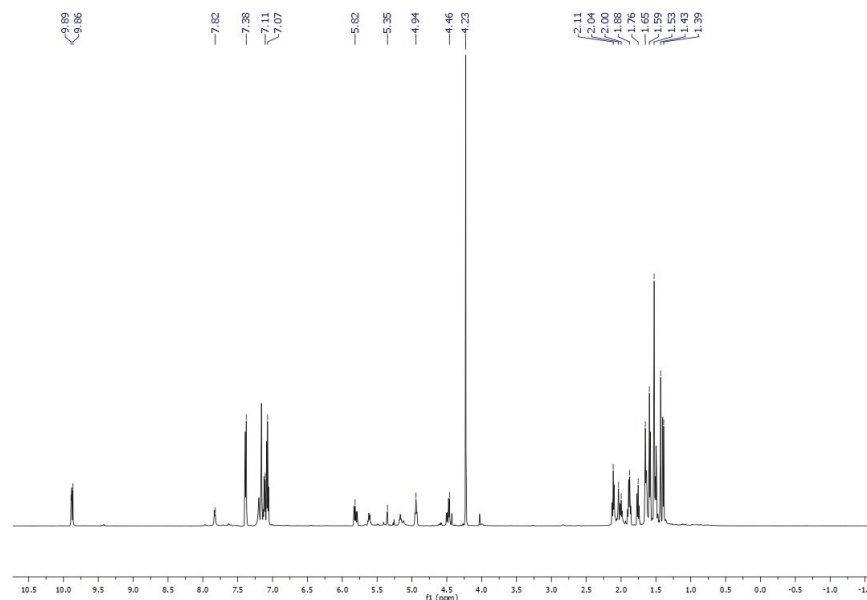

**Figure S28:**  $^1\text{H}$  NMR spectrum showing partial citral hydrosilylation in benzene- $d_6$ .

**Hydrosilylation of acetophenone using 0.05 mol% of **2** (0.1 mol% relative to Mn):** In the glove box, a neat mixture of  $\text{PhSiH}_3$  (0.233 mL, 1.873 mmol) and acetophenone (0.218 mL, 1.873 mmol) was added to **2** (0.0012 g, 0.00094 mmol) pre-weighed into a 20 mL vial. The resulting red solution became hot and started to bubble. It was stirred for 4 min and then exposed to air to deactivate the catalyst. The colorless solution was filtered and a  $^1\text{H}$  NMR spectrum was recorded. Greater than 99% conversion to  $\text{PhSiH}\{\text{OCH}(\text{Me})(\text{Ph})\}_2$  (55%) and  $\text{PhSi}\{\text{OCH}(\text{Me})(\text{Ph})\}_3$  (45%) was detected. Excess  $\text{PhSiH}_3$  was also observed. These percentages were obtained by integrating the peaks at 4.99 ppm ( $\text{PhSiH}\{\text{OCH}(\text{Me})(\text{Ph})\}_2$ ) and 5.10-5.17 ppm ( $\text{PhSi}\{\text{OCH}(\text{Me})(\text{Ph})\}_3$ ).<sup>2</sup>

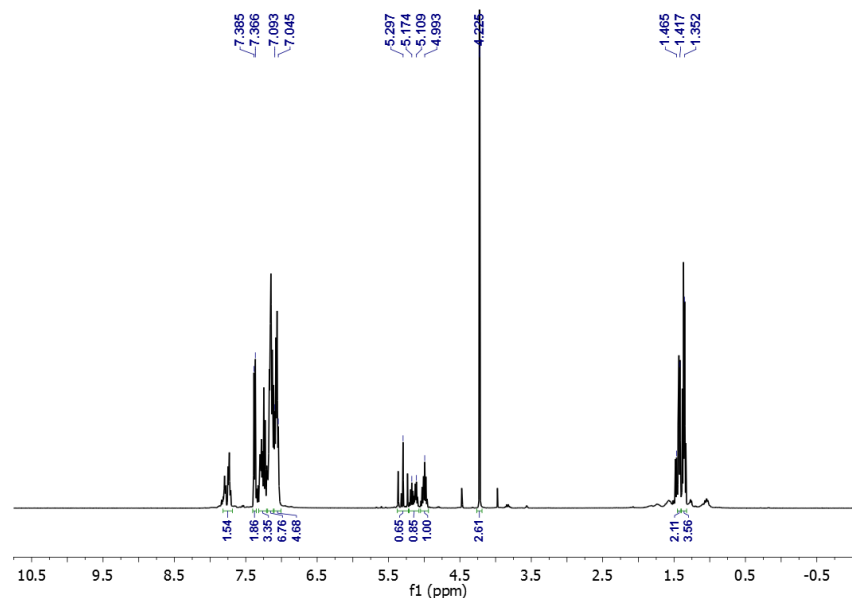

**Figure S29:**  $^1\text{H}$  NMR spectrum showing the silyl ethers prepared from acetophenone using  $\text{PhSiH}_3$  and 0.05 mol% of **2** in benzene- $d_6$ .

**Hydrosilylation of cyclohexanone using 0.05 mol% of **2** (0.1 mol% relative to Mn):** In the glove box, a neat mixture of  $\text{PhSiH}_3$  (0.233 mL, 1.873 mmol) and cyclohexanone (0.193 mL, 1.873 mmol) was added to **2** (0.0012 g, 0.00094 mmol) pre-weighed in a 20 mL vial. The resulting red solution became hot and started to bubble. It was stirred for 4 min and then exposed to air to deactivate the catalyst. The colorless solution was filtered and a  $^1\text{H}$  NMR spectrum was recorded, revealing 99% conversion to  $\text{PhSiH}(\text{OCy})_2$  and the presence of excess  $\text{PhSiH}_3$ .  $^1\text{H}$  NMR (400 MHz, benzene- $d_6$ ): 7.84 (m, 2H), 7.38 (m, 2H, excess  $\text{PhSiH}_3$ ), 7.22 (s, 3H), 7.13-7.06 (m, 3H, excess  $\text{PhSiH}_3$ ), 5.34 (s, 1H, SiH), 4.22 (s, 3H, excess  $\text{PhSiH}_3$ ), 3.97 (s, 2H, OCH), 1.87 (s, 4H, Cy), 1.65 (s, 4H, Cy), 1.53 (s, 4H, Cy), 1.33 (s, 2H, Cy), 1.15 (s, 6H, Cy).<sup>3</sup>

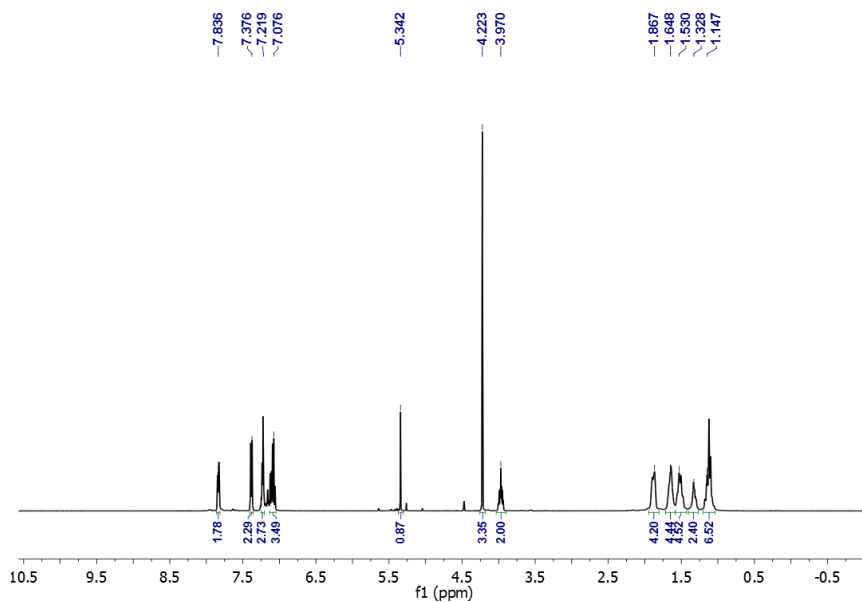

**Figure S30:**  $^1\text{H}$  NMR spectrum of  $\text{PhSiH}(\text{OCy})_2$  and  $\text{PhSiH}_3$  in benzene- $d_6$ .

**Hydrosilylation of benzaldehyde catalyzed by 0.005 mol% of **2** (0.01 mol% relative to Mn):**

In the glove box, a mixture of  $\text{PhSiH}_3$  (3.08 mL, 24.98 mmol) and benzaldehyde (2.54 mL, 24.98 mmol) was added to 0.0016 g (0.0013 mmol) of **2** pre-weighed in a 20 mL vial. The resulting red solution vigorously bubbled and became hot. It was stirred for 2 min and then exposed to air to deactivate the catalyst. The colorless solution was filtered through Celite and a  $^1\text{H}$  NMR spectrum was recorded to determine the percent conversion. It was followed by a hydrolytic work up whereby the mixture was stirred with 2 mL aqueous 10% NaOH solution at room temperature for 2 h. The organic fraction was extracted with diethyl ether (3 x 4 mL) and the organic layer was dried over anhydrous  $\text{Na}_2\text{SO}_4$ . Removal of the solvent on a rotavap afforded a colorless oil identified as benzyl alcohol (2.477 g, 22.89 mmol, yield = 92%).<sup>1</sup>

**Hydrosilylation of 4-fluorobenzaldehyde catalyzed by 0.005 mol% of **2** (0.01 mol% relative to Mn):** In the glove box, a mixture of PhSiH<sub>3</sub> (2.50 mL, 20.29 mmol) and 4-fluorobenzaldehyde (2.19 mL, 20.29 mmol) was added to 0.0013 g (0.0010 mmol) of **2** pre-weighed into a 100 mL round bottom flask. The resulting brown solution vigorously bubbled and became hot. It was stirred for 2 min and then exposed to air to deactivate the catalyst. The resulting colorless solution was filtered through Celite and a <sup>1</sup>H NMR spectrum was recorded, which showed only 18% conversion (equating to a TOF of 900 min<sup>-1</sup> per Mn).

**Attempt at benzaldehyde hydrosilylation using 0.2 mol% of Mn<sup>0</sup>:** In the glove box, a mixture of PhSiH<sub>3</sub> (2.2 mL, 18.2 mmol) and benzaldehyde (1.85 mL, 18.2 mmol) was added to 0.002 g (0.036 mmol) of Mn<sup>0</sup> powder pre-weighed into a 20 mL vial. The resulting solution was stirred for 2 min (no heat or bubbling was noticed) and then exposed to air to deactivate the catalyst. The colorless solution was filtered through Celite and a <sup>1</sup>H NMR spectrum was recorded, which revealed no conversion.

**Attempt at benzaldehyde hydrosilylation using 0.1 mol% of (THF)<sub>2</sub>MnCl<sub>2</sub>:** In the glove box, a mixture of PhSiH<sub>3</sub> (0.900 mL, 7.41 mmol) and benzaldehyde (0.750 mL, 7.41 mmol) was added to 0.002 g (0.0074 mmol) of (THF)<sub>2</sub>MnCl<sub>2</sub> pre-weighed into a 20 mL vial. The resulting solution was stirred for 2 min (no heat or bubbling was noticed) and then exposed to air to deactivate the catalyst. The colorless solution was filtered through Celite and a <sup>1</sup>H NMR spectrum was recorded, which revealed no conversion.

**Attempt at benzaldehyde hydrosilylation using 0.1 mol% **1**:** In the glove box, a mixture of PhSiH<sub>3</sub> (0.350 mL, 2.81 mmol) and benzaldehyde (0.285 mL, 2.81 mmol) was added to 0.002 g (0.0028 mmol) of **1** pre-weighed in a 20 mL vial. The resulting solution was stirred for 2 min (no heat or bubbling was noticed) and then exposed to air to deactivate the catalyst. The colorless solution was filtered through Celite and a <sup>1</sup>H NMR spectrum was recorded, which revealed no conversion.

**Test for catalyst homogeneity:** A 20 mL scintillation vial was charged with 15.61 g of  $\text{Hg}^0$  (78.05 mmol) and 0.31 mL benzaldehyde (3.12 mmol) was added to it. A solution of **2** (0.002 g, 0.0016 mmol) in 0.38 mL  $\text{PhSiH}_3$  (3.12 mmol) was added to the vial and stirred for 2 min, while heat and bubble formation was noticed. Then it was exposed to air to deactivate the catalyst. The mixture was filtered through Celite and a  $^1\text{H}$  NMR spectrum was collected, which showed >99% conversion.

**Hydrosilylation of benzaldehyde catalyzed by 0.05 mol% of **2** in absence of light:** In the glove box, a mixture of  $\text{PhSiH}_3$  (0.40 mL, 3.28 mmol) and benzaldehyde (0.33 mL, 3.28 mmol) was prepared in an electrical tape-wrapped 20 mL scintillation vial under dark conditions. Another wrapped vial was charged with 0.0021 g (0.0016 mmol) of **2**. The mixture was added to the catalyst in absence of light. The solution vigorously bubbled and became hot. It was stirred for 2 min and then exposed to air to deactivate the catalyst. The colorless solution was filtered through Celite and a  $^1\text{H}$  NMR spectrum was recorded, which revealed >99% conversion.

**Hydrosilylation of methyl formate catalyzed by 0.01 mol% of **2** (0.02 mol% relative to Mn):** In the glove box, a neat mixture of  $\text{PhSiH}_3$  (1.5 mL, 12.49 mmol) and methyl formate (0.76 mL, 12.49 mmol) was added to 0.0016 g (0.0013 mmol) of **2** pre-weighed into a 20 mL vial. The resulting brown solution vigorously bubbled and became hot. It was stirred for 30 min and then exposed to air to deactivate the catalyst. The colorless solution was filtered through Celite and a  $^1\text{H}$  NMR spectrum was recorded to determine the percent conversion (>99 %).

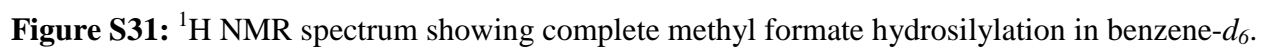

In the glove box, a neat mixture of PhSiH<sub>3</sub> (1.9 mL, 15.6 mmol) and ethyl formate (1.3 mL, 15.6 mmol) was added to 0.002 g (0.0016 mmol) of **2** pre-weighed into a 20 mL vial. The resulting brown solution vigorously bubbled and became hot. It was stirred for 30 min and then exposed to air to deactivate the catalyst. The colorless solution was filtered through Celite and a <sup>1</sup>H NMR spectrum was recorded to determine the percent conversion (>99 %).

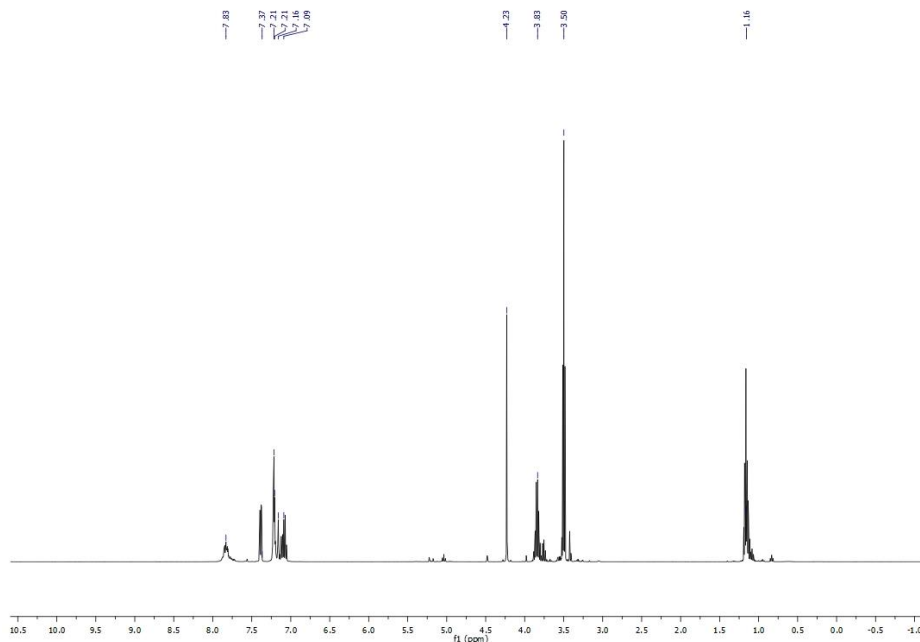

**Figure S32:**  $^1\text{H}$  NMR spectrum showing complete ethyl formate hydrosilylation in benzene- $d_6$ .

**Hydrosilylation of octyl formate catalyzed by 0.01 mol% of **2** (0.02 mol% relative to Mn):**

In the glove box, a neat mixture of  $\text{PhSiH}_3$  (1.6 mL, 13.2 mmol) and octyl formate (2.4 mL, 13.2 mmol) was added to 0.0021 g (0.0016 mmol) of **2** pre-weighed into a 20 mL vial. The resulting brown solution vigorously bubbled and became hot. It was stirred for 30 min and then exposed to air to deactivate the catalyst. The colorless solution was filtered through Celite and a  $^1\text{H}$  NMR spectrum was recorded to determine the percent conversion (>99 %). Then the reaction mixture was hydrolyzed with 2 mL 10% aqueous NaOH solution upon stirring for 2 h at room temperature. The organic fraction was extracted with diethyl ether (3 x 4 mL) and the organic layer was dried over anhydrous  $\text{Na}_2\text{SO}_4$ . Removal of the solvent on a rotavap afforded a colorless oil identified as 1-octanol (1.64 g, yield = 95 %).  $^1\text{H}$  NMR (benzene- $d_6$ ): 3.40 (2H, t, - $\text{CH}_2$ ), 1.40 (2H, m, - $\text{CH}_2$ ), 1.23 (10H, m, - $\text{CH}_2$ ), 0.90 (3H, t, - $\text{CH}_3$ ).  $\{^1\text{H}\}^{13}\text{C}$  NMR (benzene- $d_6$ ): 63.09, 33.57, 32.58, 30.20, 30.09, 26.54, 23.42 14.68.<sup>4</sup>



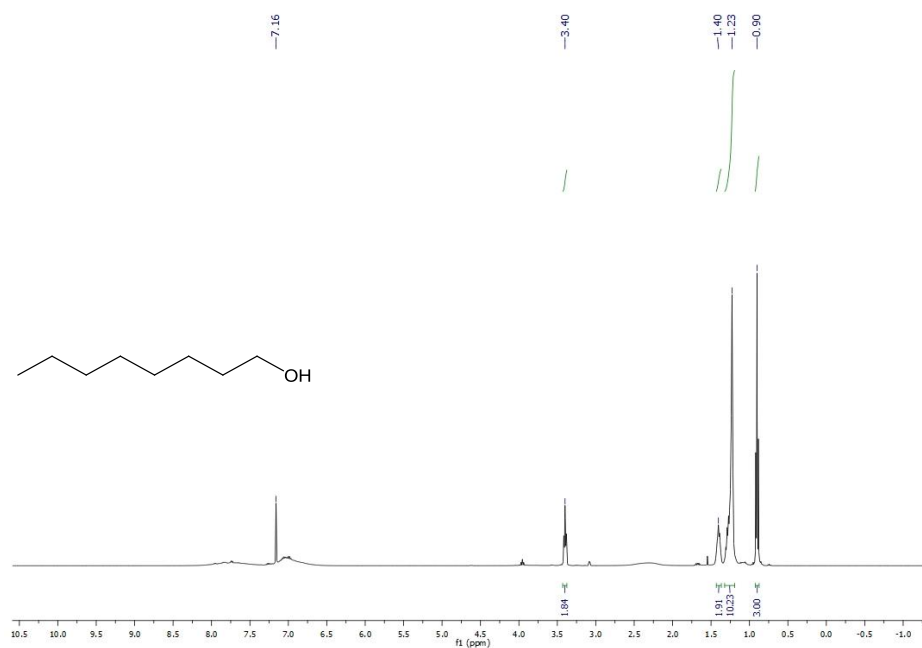

**Figure S33:**  $^1\text{H}$  NMR spectrum of 1-octanol in benzene- $d_6$ .

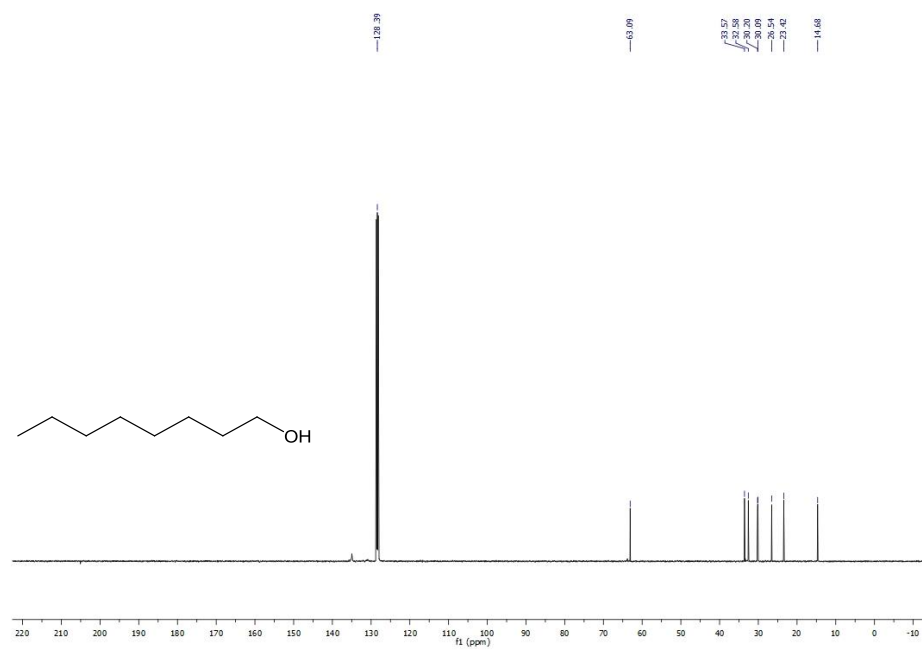

**Figure S34:**  $\{^1\text{H}\}^{13}\text{C}$  NMR spectrum of 1-octanol in benzene- $d_6$ .

**Hydrosilylation of isoamyl formate catalyzed by 0.01 mol% of **2** (0.02 mol% relative to **Mn**):** In the glove box, a neat mixture of PhSiH<sub>3</sub> (2.4 mL, 19.5 mmol) and isoamyl formate (2.6 mL, 19.5 mmol) was added to 0.0026 g (0.0019 mmol) of **2** pre-weighed in a 20 mL vial. The resulting brown solution vigorously bubbled and became hot. It was stirred for 30 min and then exposed to air to deactivate the catalyst. The colorless solution was filtered through Celite and a <sup>1</sup>H NMR spectrum was recorded to determine the percent conversion. Then the reaction mixture was hydrolyzed with 2 mL 10% aqueous NaOH solution upon stirring for 2 h at room temperature. The organic fraction was extracted with diethyl ether (3 x 4 mL) and the organic layer was dried over anhydrous Na<sub>2</sub>SO<sub>4</sub>. Removal of the solvent on a rotavap afforded a pale yellow oil identified as isoamyl alcohol (1.4 g, 15.88 mmol, yield = 83 %). <sup>1</sup>H NMR (benzene-*d*<sub>6</sub>): 3.34 (2H, t, -CH<sub>2</sub>), 1.57 (1H, m, -CH), 1.25 (2H, m, -CH<sub>2</sub>), 0.81 (6H, d, CH<sub>3</sub>). {<sup>1</sup>H}<sup>13</sup>C NMR (benzene-*d*<sub>6</sub>): 61.33, 42.30, 25.28, 23.09.<sup>1</sup>

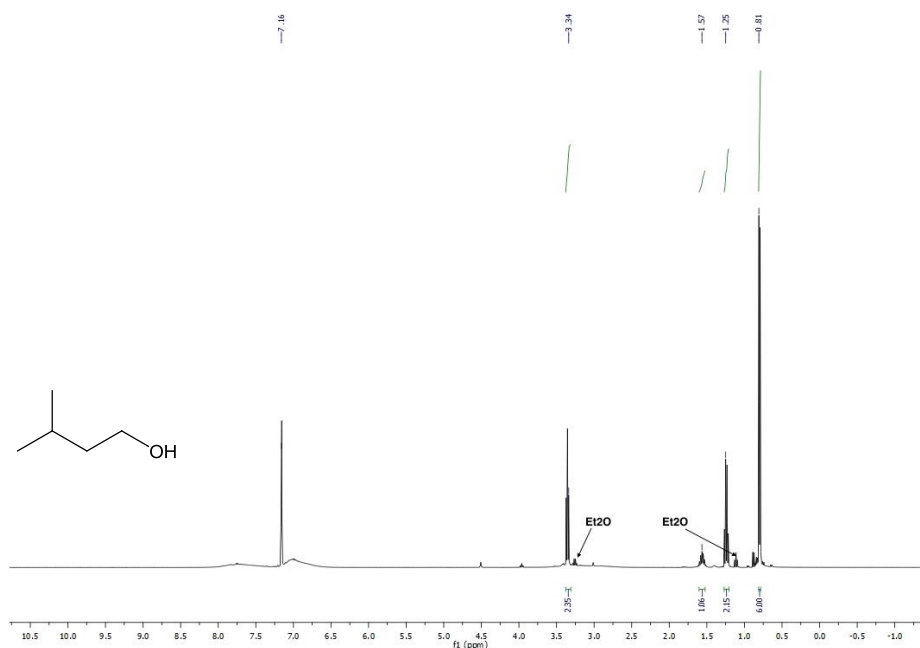

**Figure S35:** <sup>1</sup>H NMR spectrum of isoamyl alcohol in benzene-*d*<sub>6</sub>.

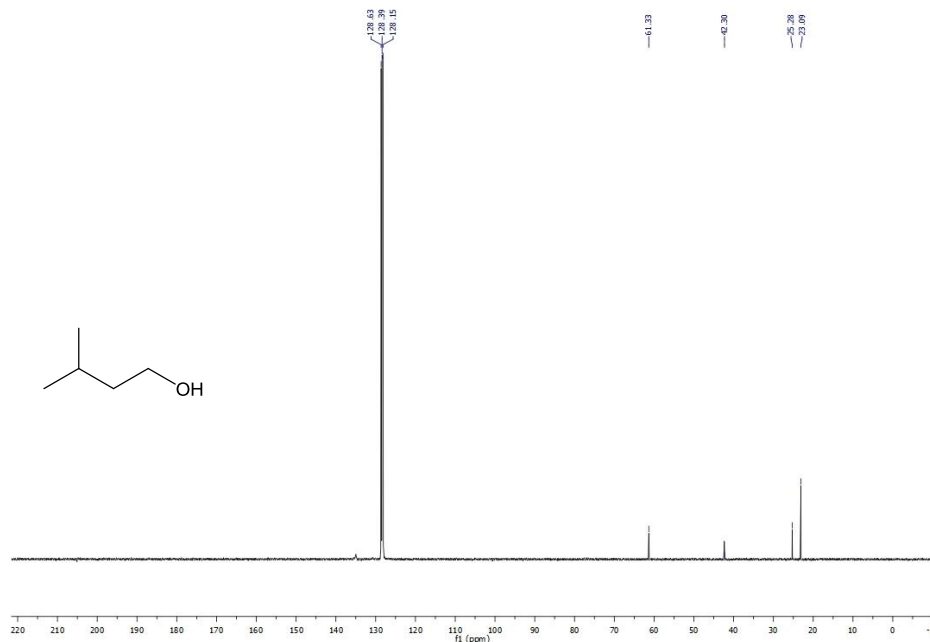

**Figure S36:**  $\{^1\text{H}\}^{13}\text{C}$  NMR spectrum of isoamyl alcohol in benzene- $d_6$ .

**Hydrosilylation of benzyl formate catalyzed by 0.01 mol% of **2** (0.02 mol% relative to Mn):**

In the glove box, a neat mixture of  $\text{PhSiH}_3$  (2.4 mL, 19.51 mmol) and benzyl formate (2.4 mL, 19.51 mmol) was added to 0.0025 g (0.0019 mmol) of **2** pre-weighed into a 20 mL vial. The resulting brown solution vigorously bubbled and became hot. It was stirred for 30 min and then exposed to air to deactivate the catalyst. The colorless solution was filtered through Celite and a  $^1\text{H}$  NMR spectrum was recorded to determine the percent conversion. Then the reaction mixture was hydrolyzed with 2 mL 10% aqueous NaOH solution upon stirring for 2 h at room temperature. The organic fraction was extracted with diethyl ether (3 x 4 mL) and the organic layer was dried over anhydrous  $\text{Na}_2\text{SO}_4$ . Removal of the solvent on a rotavap afforded a pale yellow oil identified as benzyl alcohol (2.06 g, 19.05 mmol, yield = 99%).  $^1\text{H}$  NMR (benzene- $d_6$ ): 7.09-7.14 (5H, m, *phenyl*), 4.30 (2H, s,  $-\text{CH}_2\text{OH}$ ), 1.42 (1H, br,  $-\text{OH}$ ).  $\{^1\text{H}\}^{13}\text{C}$  NMR (benzene- $d_6$ ): 142.11, 128.91, 127.80, 127.32, 65.20.<sup>1</sup>

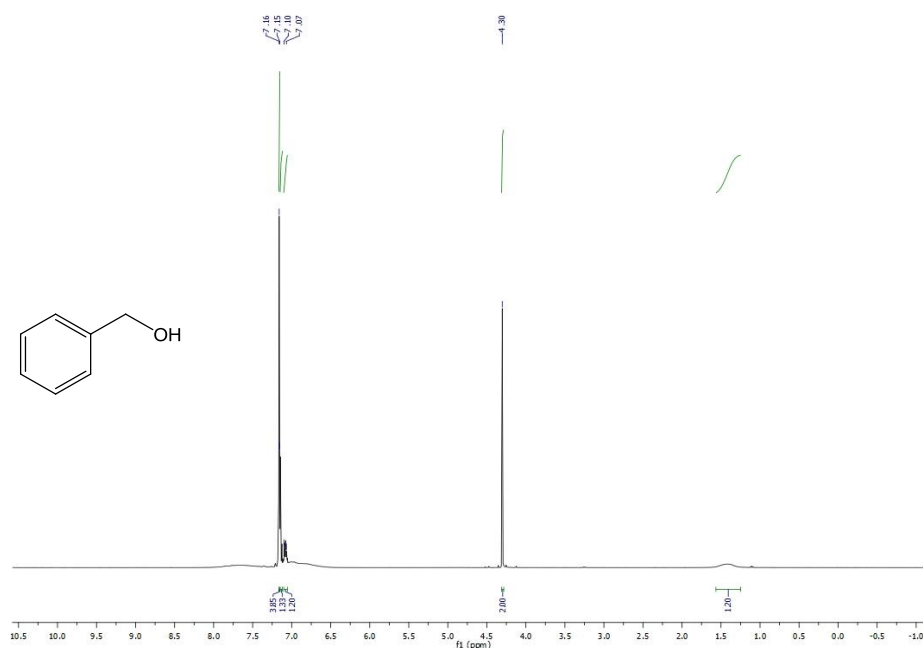

**Figure S37:** <sup>1</sup>H NMR spectrum of benzyl alcohol in benzene-*d*<sub>6</sub>.

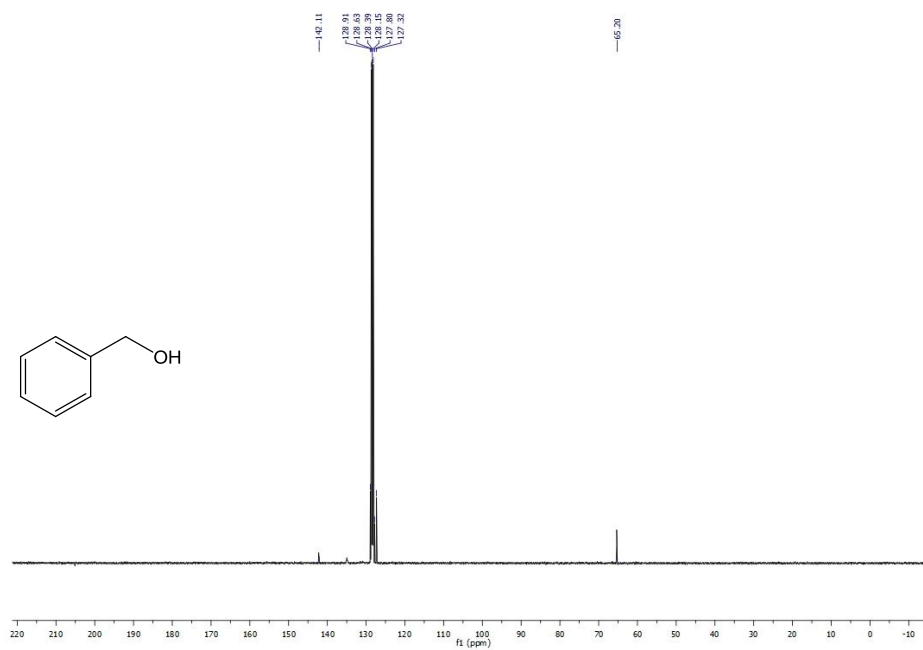

**Figure S38:** {<sup>1</sup>H} <sup>13</sup>C NMR of benzyl alcohol in benzene-*d*<sub>6</sub>.

**Hydrosilylation of *p*-anisyl formate catalyzed by 0.01 mol% of **2** (0.02 mol% relative to **Mn**):** In the glove box, a neat mixture of PhSiH<sub>3</sub> (2.7 mL, 21.8 mmol) and *p*-anisyl formate (3.5 mL, 21.8 mmol) was added to 0.0028 g (0.0022 mmol) of **2** pre-weighed into a 20 mL vial. The resulting brown solution vigorously bubbled and became hot. It was stirred for 30 min and then exposed to air to deactivate the catalyst. The colorless solution was filtered through Celite and a <sup>1</sup>H NMR spectrum was recorded to determine the percent conversion. Then the reaction mixture was hydrolyzed with 2 mL 10% aqueous NaOH solution upon stirring for 2 h at room temperature. The organic fraction was extracted with diethyl ether (3 x 4 mL) and the organic layer was dried over anhydrous Na<sub>2</sub>SO<sub>4</sub>. Removal of the solvent on a rotavap afforded a pale yellow oil identified as 4-methoxybenzyl alcohol (2.9 g, 20.99 mmol, yield = 86%). <sup>1</sup>H NMR (benzene-*d*<sub>6</sub>): 7.09 (2H, d, *phenyl*), 6.75 (2H, d, *phenyl*), 4.34 (2H, s, -CH<sub>2</sub>OH), 3.31 (3H, s, -OCH<sub>3</sub>). {<sup>1</sup>H} <sup>13</sup>C NMR (benzene-*d*<sub>6</sub>): 159.76, 134.37, 114.46, 65.06, 55.14.<sup>1</sup>

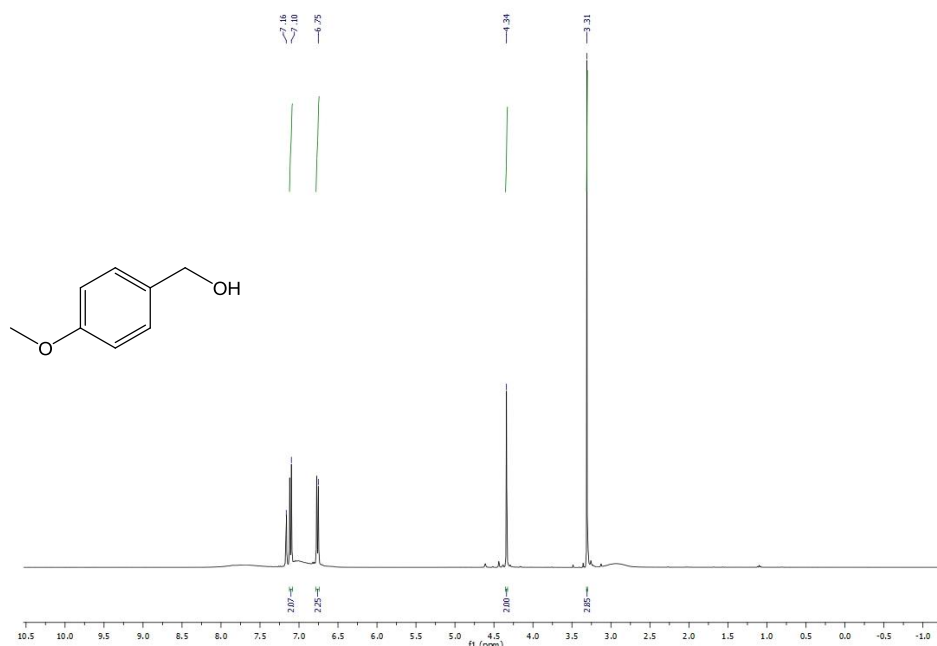

**Figure S39:** <sup>1</sup>H NMR spectrum of 4-methoxybenzyl alcohol in benzene-*d*<sub>6</sub>.

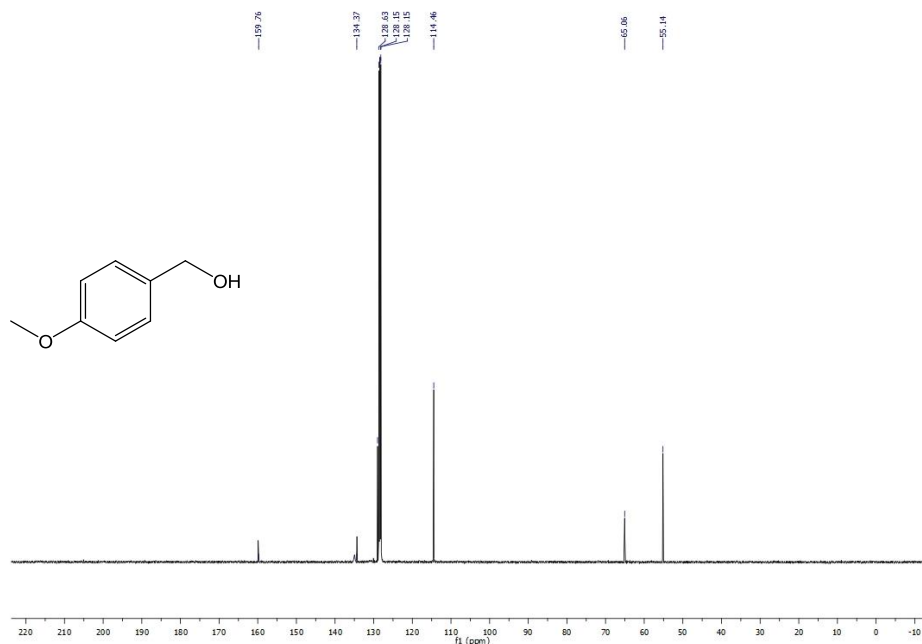

**Figure S40:**  $\{^1\text{H}\}^{13}\text{C}$  NMR spectrum of 4-methoxybenzyl alcohol in benzene- $d_6$ .

**Hydrosilylation of ethyl acetate using 0.5 mol% of **2** (1 mol% relative to Mn):** In the glove box, a solution of  $\text{PhSiH}_3$  (53.9  $\mu\text{L}$ , 0.437 mmol) and ethyl acetate (42.9  $\mu\text{L}$ , 0.437 mmol) in 0.7 mL of benzene- $d_6$  was added to **2** (0.0028 g, 0.00219 mmol) pre-weighed in a 20 mL vial. The resulting red solution was transferred into a J. Young tube and sealed under  $\text{N}_2$  atmosphere. The progress of the reaction was monitored by  $^1\text{H}$  NMR spectroscopy, which revealed >99% conversion after 7.2 h to  $\text{PhSi}(\text{OEt})_3$ . Excess  $\text{PhSiH}_3$  was also observed.  $^1\text{H}$  NMR (400 MHz, benzene- $d_6$ ): 7.85 (m, 2H), 7.38 (excess  $\text{PhSiH}_3$ ), 7.22 (m, 3H), 7.13-7.06 (m, 2H, excess  $\text{PhSiH}_3$ ), 4.22 (s, excess  $\text{PhSiH}_3$ ), 3.85 (qd,  $J = 7.0, 0.9$  Hz, 6H), 1.17 (td,  $J = 7.0, 0.9$  Hz, 9H).<sup>2</sup>

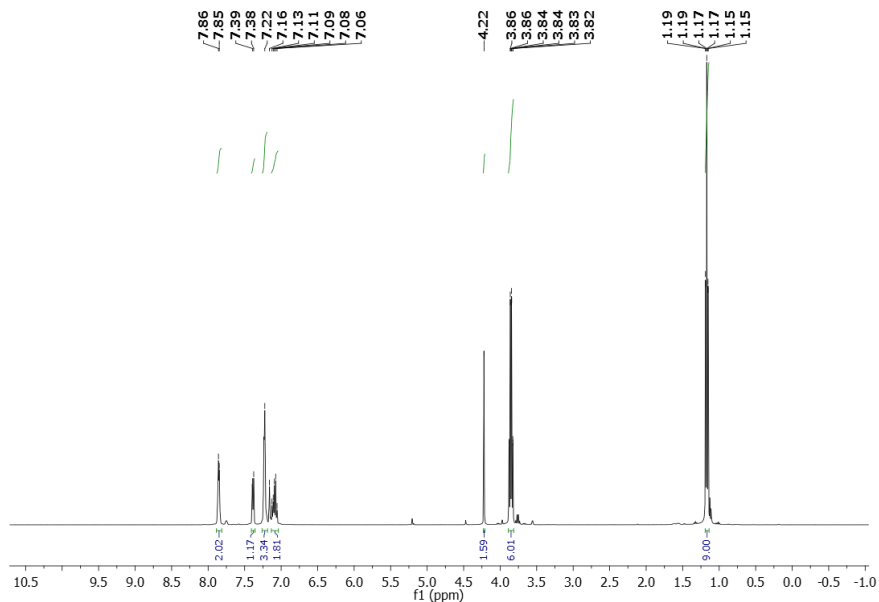

**Figure S41:**  $^1\text{H}$  NMR spectrum of  $\text{PhSi}(\text{OEt})_3$  and  $\text{PhSiH}_3$  in benzene- $d_6$ .

## REFERENCES

- <sup>1</sup> Mukhopadhyay, T. K.; Rock, C. L.; Ashley, D. C.; Hong, M.; Groy, T. L.; Baik, M.-H.; Trovitch, R. J. *J. Am. Chem. Soc.* **2017**, *139*, 4901-4915.
- <sup>2</sup> Mukhopadhyay, T. K.; Flores, M.; Groy, T. L.; Trovitch, R. J. *J. Am. Chem. Soc.* **2014**, *136*, 882-885.
- <sup>3</sup> Ghosh, C.; Mukhopadhyay, T. K.; Flores, M.; Groy, T. L.; Trovitch, R. J. *Inorg. Chem.* **2015**, *54*, 10398-10406.
- <sup>4</sup> Zhang, G.; Scott, B. L.; Hanson, S. K. *Angew. Chem., Int. Ed.* **2012**, *51*, 12102-12106.
